# Supplementary material for: Metabolic biomarker profiling for identification of susceptibility to severe pneumonia and COVID-19 in the general population
Source: eLife. 2021 May 4;10:e63033. doi: 10.7554/eLife.63033 (PMC8172246; doi:10.7554/eLife.63033)
Supplement: Figure 3—source data 1. [file elife-63033-fig3-data1.csv]

category	adjustment_or_subgroup	biomarker_name	unit_of_associations	odds_ratio	beta	se	pvalue
Additional adjustments	Age, sex and assessment center	Infectious disease score	SD	1.6683306735585772	0.5118235298272202	0.026085308723157476	1.0203635731237881e-85
Additional adjustments	Age, sex, assmt. center, BMI and smoking status	Infectious disease score	SD	1.591427020774941	0.4646311110649467	0.028179717342154728	4.464871831812095e-61
Additional adjustments	Age, sex, assmt. center, BMI, smoking status and prevalent diseases	Infectious disease score	SD	1.5061072432198013	0.409528337479663	0.02924100387535447	1.4471588326477114e-44
Individuals with and without prevalent diseases	All individuals	Infectious disease score	SD	1.6683306735585772	0.5118235298272202	0.026085308723157476	1.0203635731237881e-85
Individuals with and without prevalent diseases	Without prevalent diseases	Infectious disease score	SD	1.623668124620069	0.4846878640947569	0.032665559652882384	8.334063046911379e-50
Age at blood sampling	39-53	Infectious disease score	SD	1.538182753903228	0.43060168970904333	0.07648926270618042	1.8065901756373475e-8
Age at blood sampling	53-61	Infectious disease score	SD	1.799410898074969	0.5874593324874696	0.046539841474419995	1.5826141644504153e-36
Age at blood sampling	61-70	Infectious disease score	SD	1.6253281279722789	0.4857097203036287	0.03476137631089964	2.2883794385344006e-44
Men and women separately	Men	Infectious disease score	SD	1.6728628507543244	0.5145364406134165	0.03590513837529667	1.4122248087293087e-46
Men and women separately	Women	Infectious disease score	SD	1.6607422029882626	0.5072646126783479	0.03807320184806117	1.6921501470262404e-40
Additional adjustments	Age, sex and assessment center	Infectious disease score	Q5vsQ1	3.7552883386202307	1.3231650701828988	0.10989561105671893	2.1842704519922775e-33
Additional adjustments	Age, sex, assmt. center, BMI and smoking status	Infectious disease score	Q5vsQ1	3.4147159987153612	1.2280943266700513	0.12004320082805447	1.4486515190298683e-24
Additional adjustments	Age, sex, assmt. center, BMI, smoking status and prevalent diseases	Infectious disease score	Q5vsQ1	3.077177032359312	1.1240126287633077	0.12213479216885835	3.479301254013626e-20
Individuals with and without prevalent diseases	All individuals	Infectious disease score	Q5vsQ1	3.7552883386202307	1.3231650701828988	0.10989561105671893	2.1842704519922775e-33
Individuals with and without prevalent diseases	Without prevalent diseases	Infectious disease score	Q5vsQ1	3.304906541405247	1.1954081949628974	0.12108493050531703	5.479448132058481e-23
Age at blood sampling	39-53	Infectious disease score	Q5vsQ1	3.4569477323456885	1.2403860414574388	0.27510500542731087	6.520360445586843e-6
Age at blood sampling	53-61	Infectious disease score	Q5vsQ1	4.721977058849814	1.5522275802969692	0.18392913214802203	3.1932608621856967e-17
Age at blood sampling	61-70	Infectious disease score	Q5vsQ1	3.399303638618075	1.2235705984740843	0.15893680612702807	1.3770258241520403e-14
Men and women separately	Men	Infectious disease score	Q5vsQ1	3.87944432028204	1.3556919269565764	0.1763672824307564	1.509148225448202e-14
Men and women separately	Women	Infectious disease score	Q5vsQ1	3.6853477172979203	1.3043648813790523	0.14111349335055381	2.388430507249117e-20
