# Supplementary material for: Metabolic biomarker profiling for identification of susceptibility to severe pneumonia and COVID-19 in the general population
Source: eLife. 2021 May 4;10:e63033. doi: 10.7554/eLife.63033 (PMC8172246; doi:10.7554/eLife.63033)
Supplement: Figure 5—source data 1. [file elife-63033-fig5-data1.csv]

percentile	pct_event
1	0.5618
2	0.1984
3	0.5871
4	1.5595
5	0.9634
6	1.7308
7	1.2891
8	1.2750
9	1.3333
10	1.7045
11	0.7921
12	0.3731
13	0.9785
14	0.9225
15	1.6917
16	0.9398
17	1.5625
18	1.1111
19	1.1278
20	0.7561
21	0.9579
22	0.4016
23	0.9328
24	1.7013
25	0.9881
26	1.7682
27	1.6014
28	1.6949
29	1.4760
30	1.3436
31	1.3725
32	1.1009
33	1.1650
34	1.8587
35	1.5123
36	0.7477
37	1.9417
38	0.7421
39	1.1070
40	2.0833
41	1.8657
42	0.7505
43	2.2989
44	1.6854
45	1.3619
46	0.7752
47	1.4085
48	2.8807
49	1.8868
50	2.2857
51	2.2099
52	2.4668
53	1.6514
54	2.3301
55	2.4030
56	1.8116
57	2.5974
58	2.4299
59	1.6667
60	1.5180
61	2.7881
62	2.8409
63	2.0295
64	2.9014
65	2.3904
66	2.0110
67	2.1978
68	2.9466
69	1.9569
70	2.1526
71	2.8463
72	2.5000
73	2.3576
74	1.1905
75	2.7290
76	3.7594
77	2.3381
78	1.7143
79	2.7397
80	2.9412
81	2.6515
82	2.7559
83	3.5647
84	3.2567
85	3.6329
86	4.1016
87	2.6871
88	4.1016
89	3.6969
90	6.4579
91	5.0388
92	4.4402
93	5.7495
94	4.3478
95	5.2727
96	4.4177
97	8.3168
98	8.1836
99	8.1712
100	13.8655
