# Supplementary material for: Metabolic biomarker profiling for identification of susceptibility to severe pneumonia and COVID-19 in the general population
Source: eLife. 2021 May 4;10:e63033. doi: 10.7554/eLife.63033 (PMC8172246; doi:10.7554/eLife.63033)
Supplement: Figure 8—source data 1. [file elife-63033-fig8-data1.csv]

category	adjustment_or_subgroup	biomarker_name	unit_of_associations	odds_ratio	beta	se	pvalue
Additional adjustments	Age, sex and assessment center	Infectious disease score	SD	1.4028822219048422	0.3385288502728453	0.036893692465951367	4.4826674263709067e-20
Additional adjustments	Age, sex, assmt. center, BMI and smoking status	Infectious disease score	SD	1.2600755287166145	0.2311716625927358	0.041316220678086206	2.203938854880603e-8
Additional adjustments	Age, sex, assmt. center, BMI, smoking status and prevalent diseases	Infectious disease score	SD	1.2095714945768559	0.19026616017409329	0.042200937203492855	6.526398988396007e-6
Individuals with and without prevalent diseases	All individuals	Infectious disease score	SD	1.4028822219048422	0.3385288502728453	0.036893692465951367	4.4826674263709067e-20
Individuals with and without prevalent diseases	Without prevalent diseases	Infectious disease score	SD	1.3244046899744741	0.2809630678916262	0.04522984955429376	5.23494665911863e-10
Age at the time of COVID-19 pandemic	49-64	Infectious disease score	SD	1.2430976167186119	0.21760634260559555	0.07248002251674109	0.0026795318526231264
Age at the time of COVID-19 pandemic	64-73	Infectious disease score	SD	1.526296438345435	0.42284417241425826	0.07013859763082024	1.6528947127747786e-9
Age at the time of COVID-19 pandemic	73-84	Infectious disease score	SD	1.3969678359254907	0.3343040563343934	0.0553894658718382	1.5845466215308128e-9
Men and women separately	Men	Infectious disease score	SD	1.3391905424059691	0.2920653586059514	0.049973552152004226	5.0840158459680375e-9
Men and women separately	Women	Infectious disease score	SD	1.4763653437074005	0.38958321838654963	0.054963884765210885	1.3607822164808687e-12
Additional adjustments	Age, sex and assessment center	Infectious disease score	Q5vsQ1	2.856735333668146	1.0496794811094443	0.1452493437491677	4.94719971221168e-13
Additional adjustments	Age, sex, assmt. center, BMI and smoking status	Infectious disease score	Q5vsQ1	2.0971574534371578	0.7405828341926731	0.16144449580551143	4.491684268848042e-6
Additional adjustments	Age, sex, assmt. center, BMI, smoking status and prevalent diseases	Infectious disease score	Q5vsQ1	1.9428110497329245	0.6641359190030938	0.1640503088053851	5.157614495006649e-5
Individuals with and without prevalent diseases	All individuals	Infectious disease score	Q5vsQ1	2.856735333668146	1.0496794811094443	0.1452493437491677	4.94719971221168e-13
Individuals with and without prevalent diseases	Without prevalent diseases	Infectious disease score	Q5vsQ1	2.1203348655626932	0.7515740316643724	0.15940690095003374	2.4193057996435145e-6
Age at the time of COVID-19 pandemic	49-64	Infectious disease score	Q5vsQ1	1.9381183343619128	0.6617175716467527	0.2420777548023551	0.00626666727742393
Age at the time of COVID-19 pandemic	64-73	Infectious disease score	Q5vsQ1	3.0766461489090684	1.1238400909974593	0.26165743691992716	1.7462894751227492e-5
Age at the time of COVID-19 pandemic	73-84	Infectious disease score	Q5vsQ1	3.9002867824970986	1.3610500844057256	0.27621288669027894	8.327132313207615e-7
Men and women separately	Men	Infectious disease score	Q5vsQ1	2.461391746937338	0.9007269407551655	0.20886567322686633	1.614408250319555e-5
Men and women separately	Women	Infectious disease score	Q5vsQ1	3.242541169325278	1.1763573339128324	0.19897439497749744	3.3776497350223525e-9
