# Supplementary material for: Metabolic biomarker profiling for identification of susceptibility to severe pneumonia and COVID-19 in the general population
Source: eLife journal article supplement (doi:10.7554/elife.63033), 2021-05-04
Supplement: supp [file elife-63033-supp-v1.zip]

### Total lipids

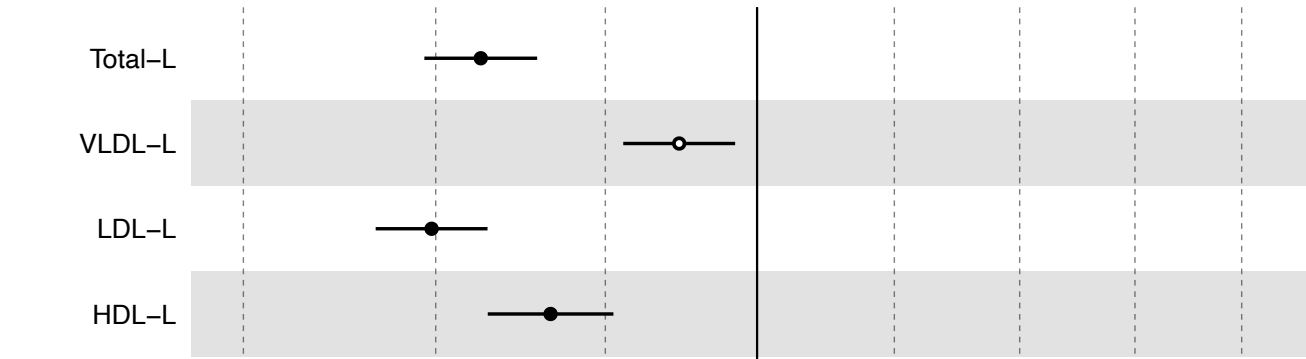

### Free cholesterol

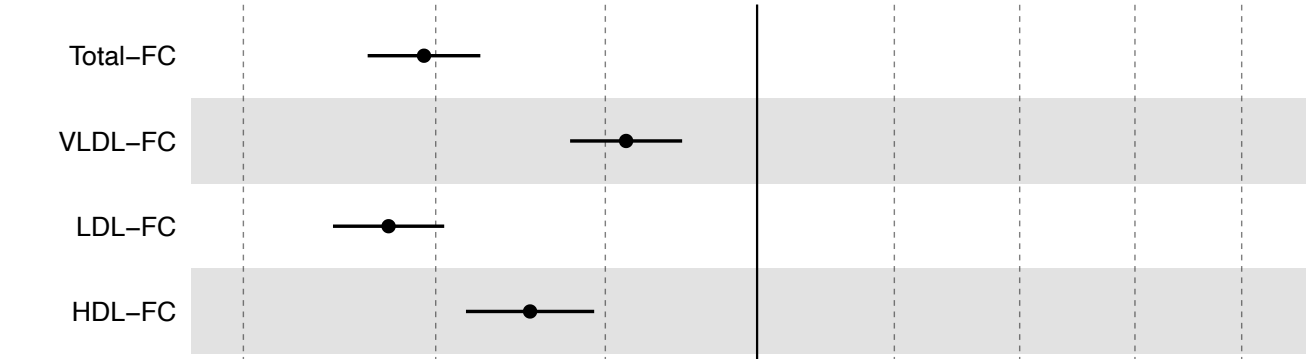

### Cholesteryl esters

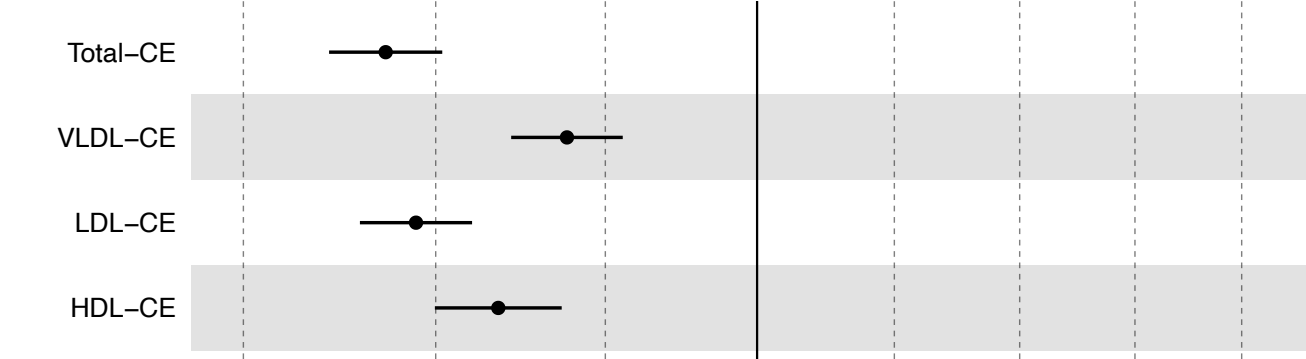

### Cholesterol in lipoproteins

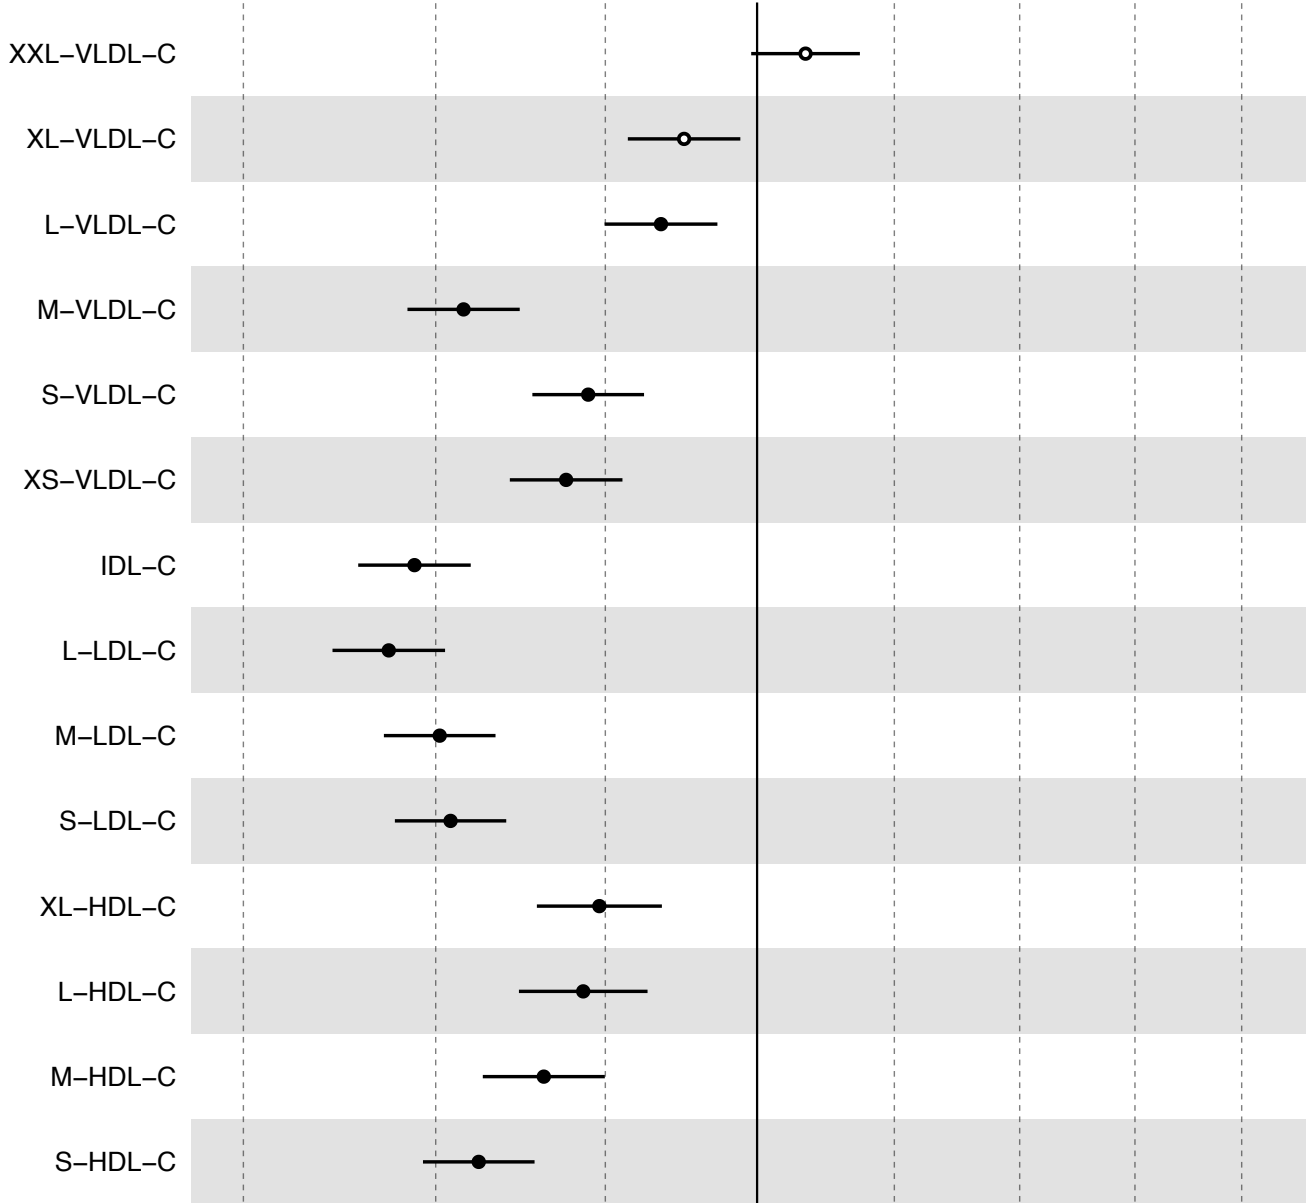

### Triglycerides in lipoproteins

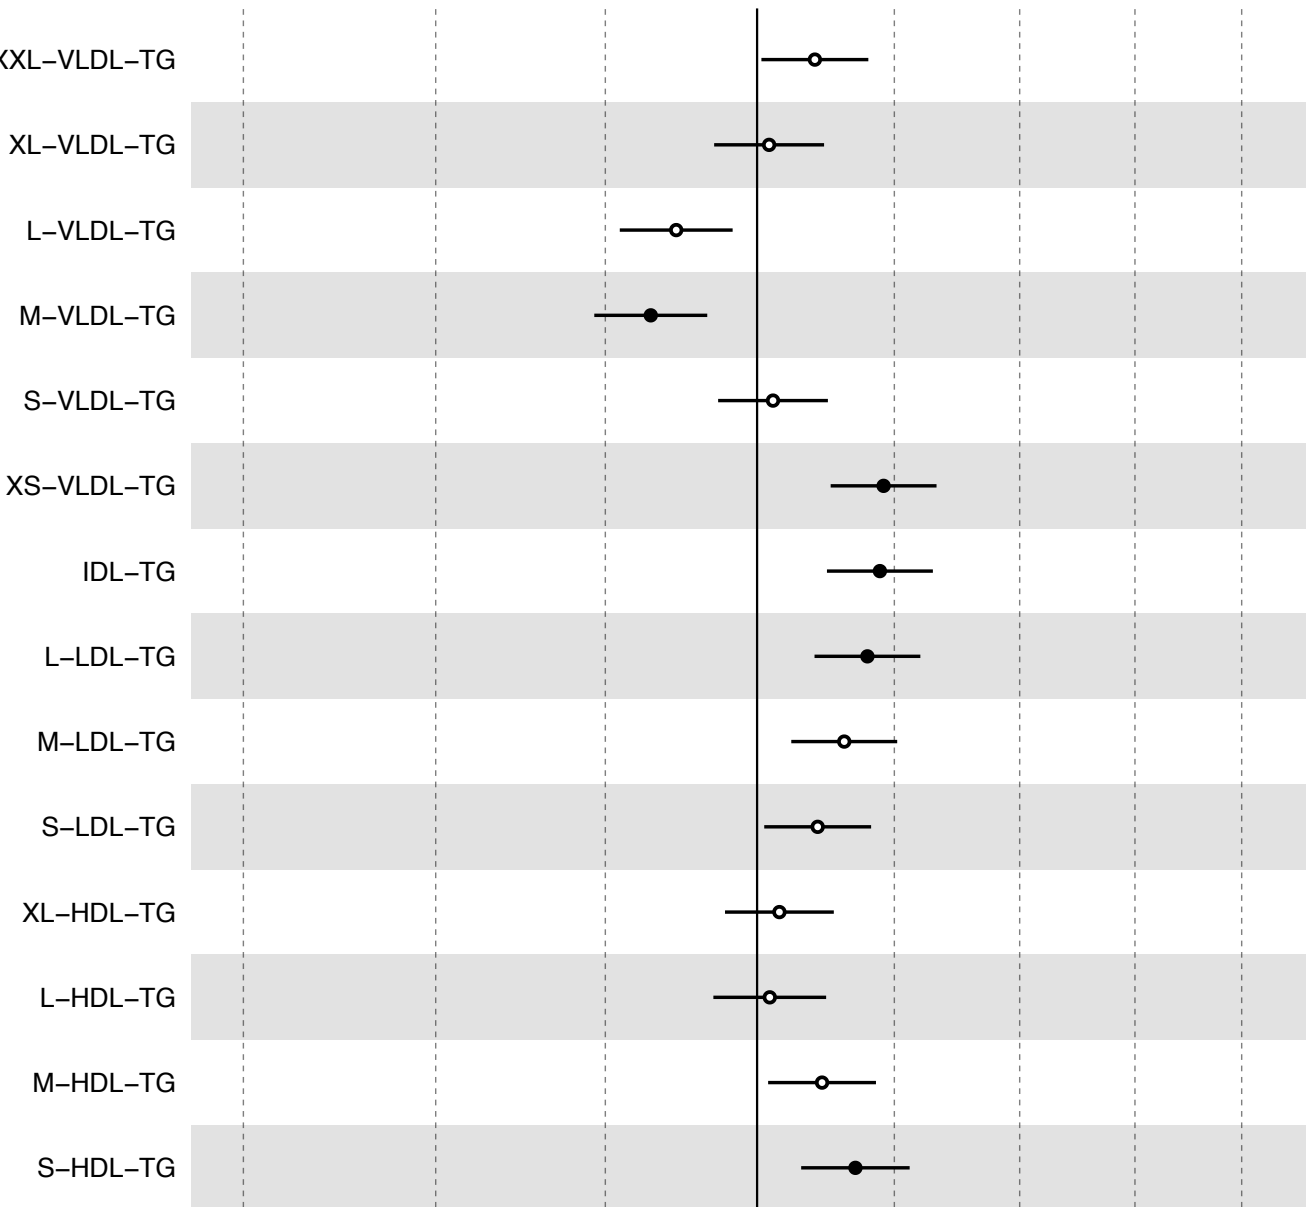

Odds ratio for severe pneumonia (95% CI),  
per 1-SD increment in biomarker value

### Lipoprotein particle concentrations

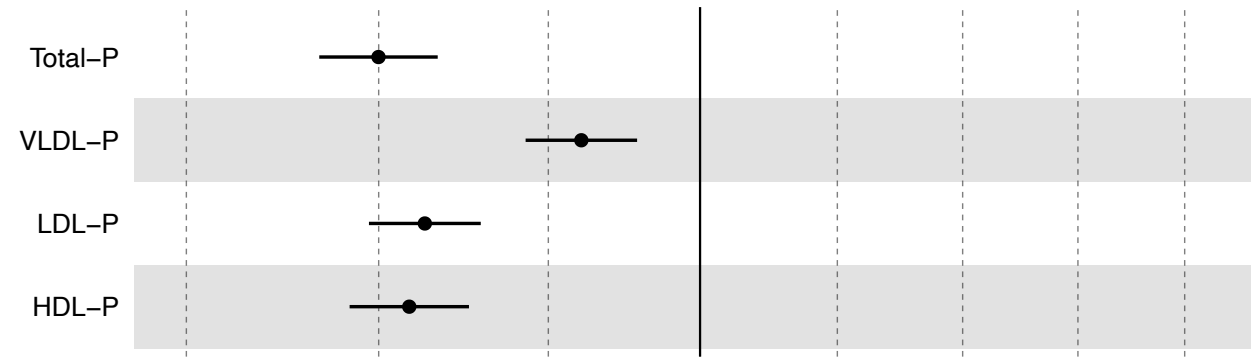

### Phospholipids

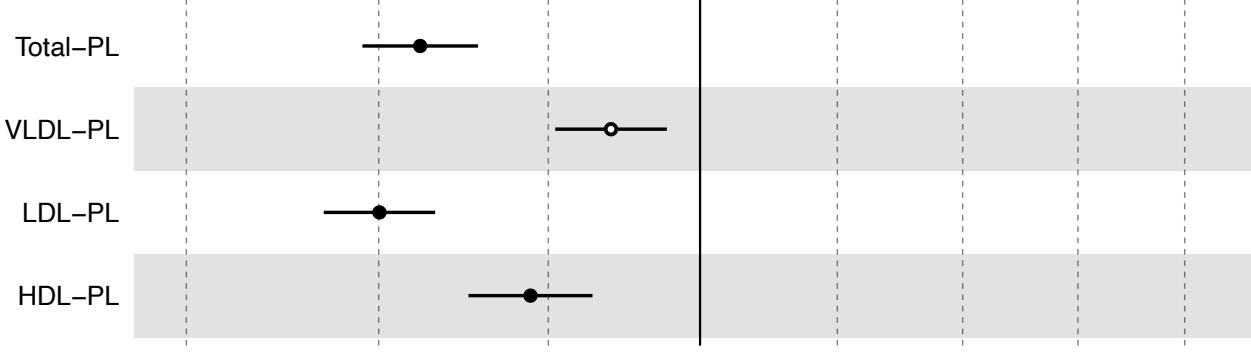

### Other lipids

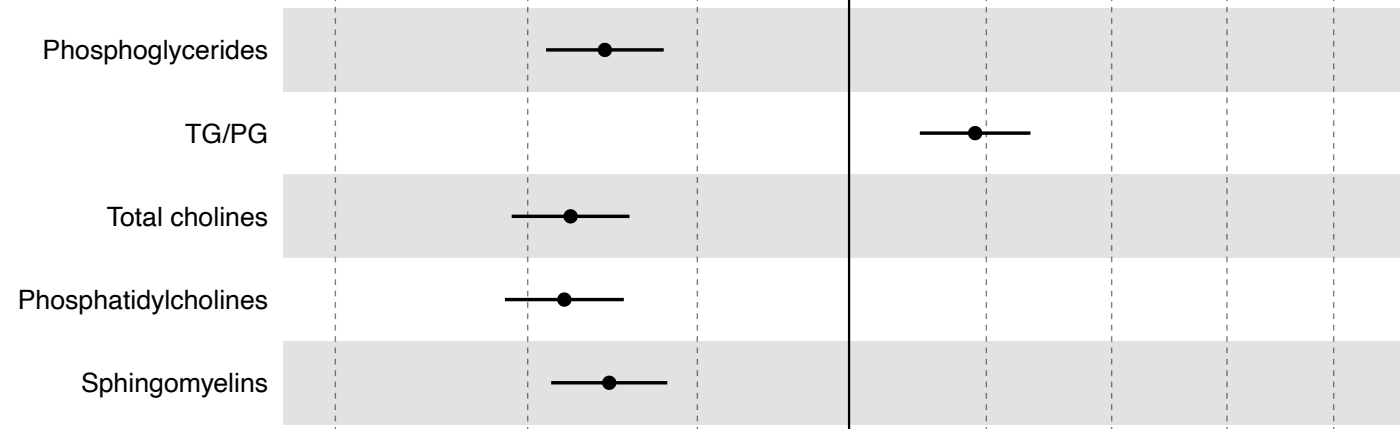

### Cholesterol in lipoproteins (%)

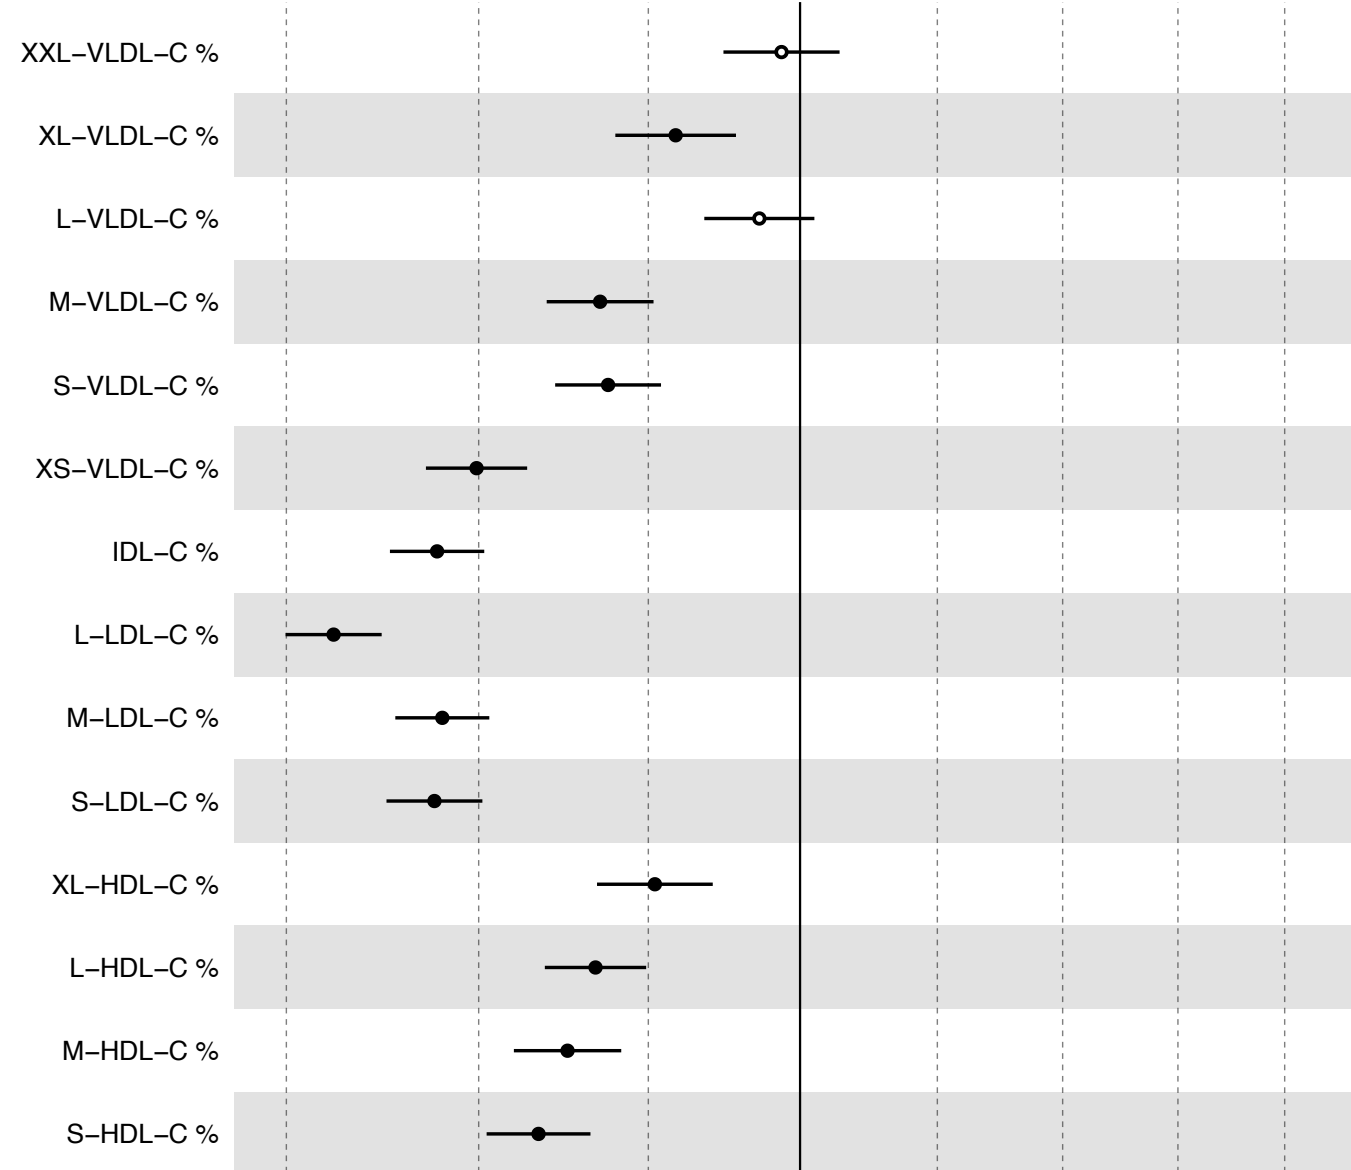

### Triglycerides in lipoproteins (%)

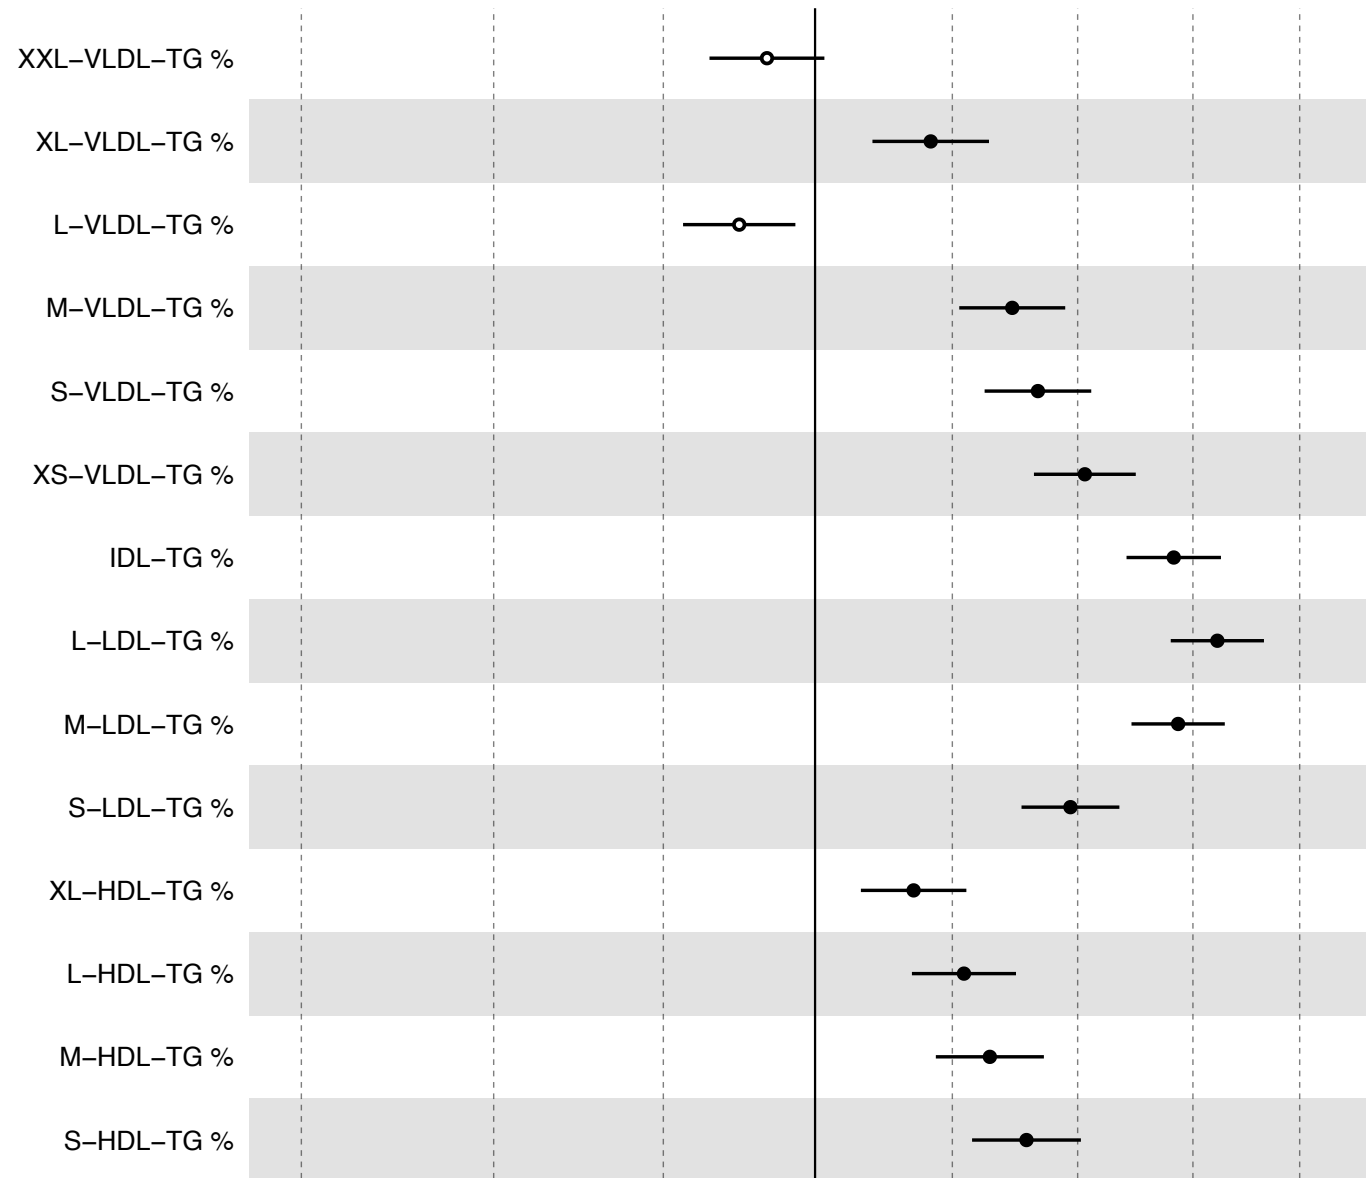

Odds ratio for severe pneumonia (95% CI),  
per 1-SD increment in biomarker value
