# Supplementary material for: Metabolic biomarker profiling for identification of susceptibility to severe pneumonia and COVID-19 in the general population
Source: eLife journal article supplement (doi:10.7554/elife.63033), 2021-05-04

A

Mimicking the decade lag to the COVID–19 pandemic

- Age, sex and assessment center
- Age, sex, assmt. center, BMI and smoking status
- Age, sex, assmt. center, BMI, smoking status and prevalent diseases

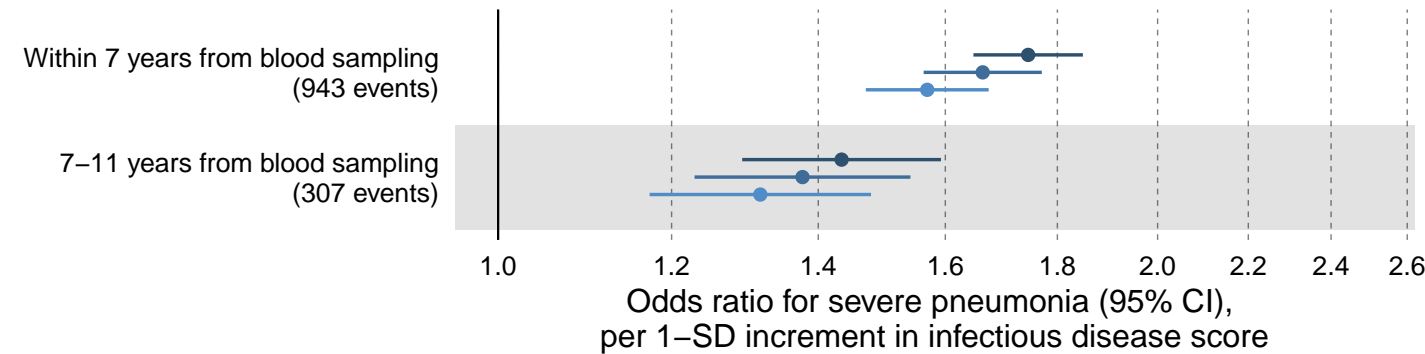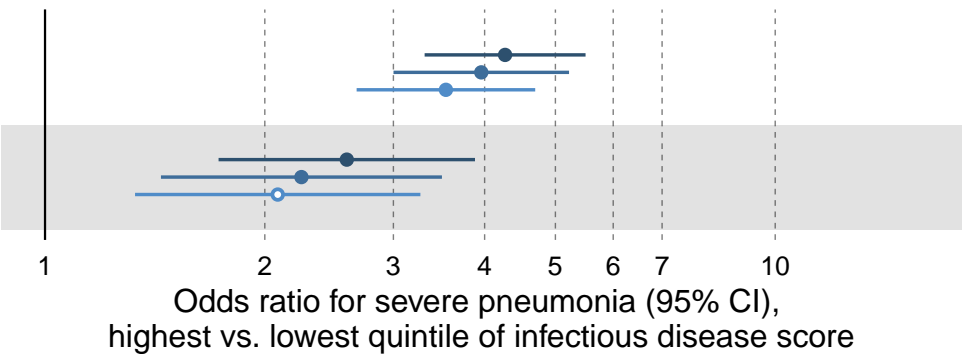

B

Mimicking a preventative screening scenario carried out today

- Age, sex and assessment center
- Age, sex, assmt. center, BMI and smoking status
- Age, sex, assmt. center, BMI, smoking status and prevalent diseases

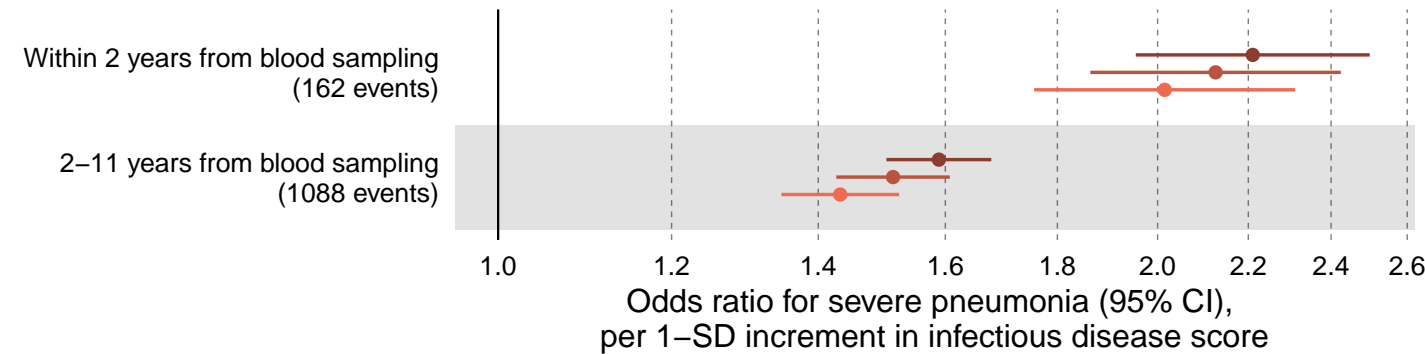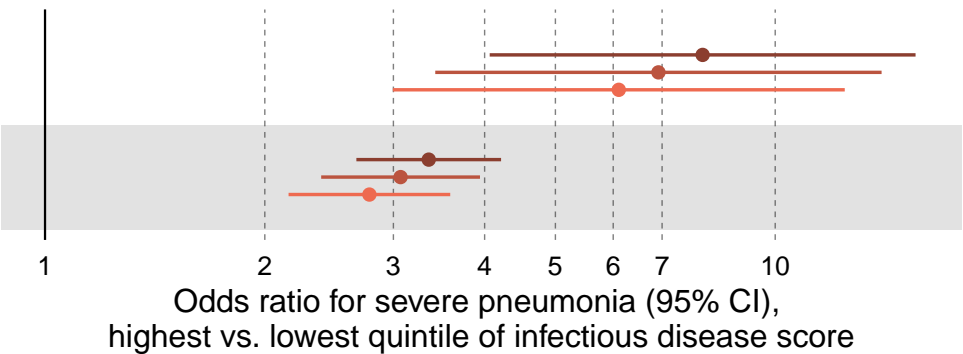

Supplement: supp [file elife-63033-supp-v1.zip]
