# Supplementary material for: Metabolic biomarker profiling for identification of susceptibility to severe pneumonia and COVID-19 in the general population
Source: eLife journal article supplement (doi:10.7554/elife.63033), 2021-05-04

Cholesterol

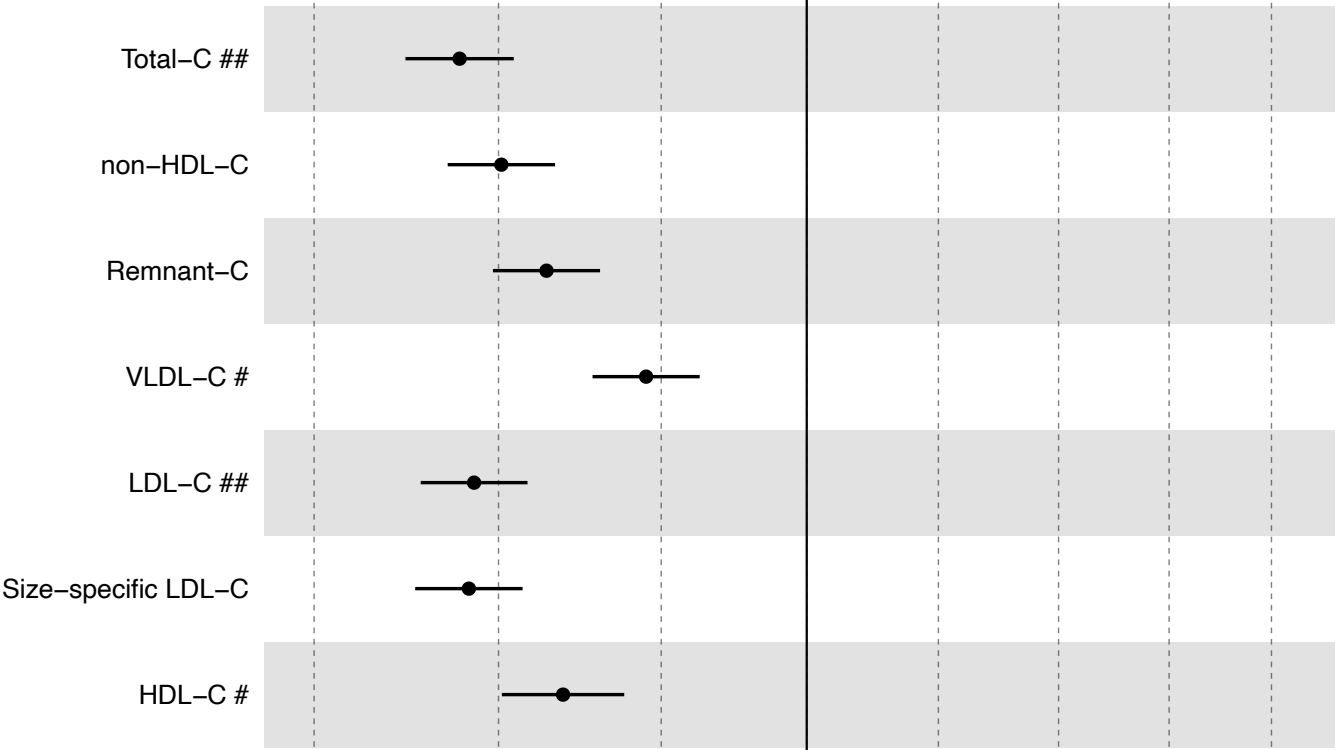

Triglycerides

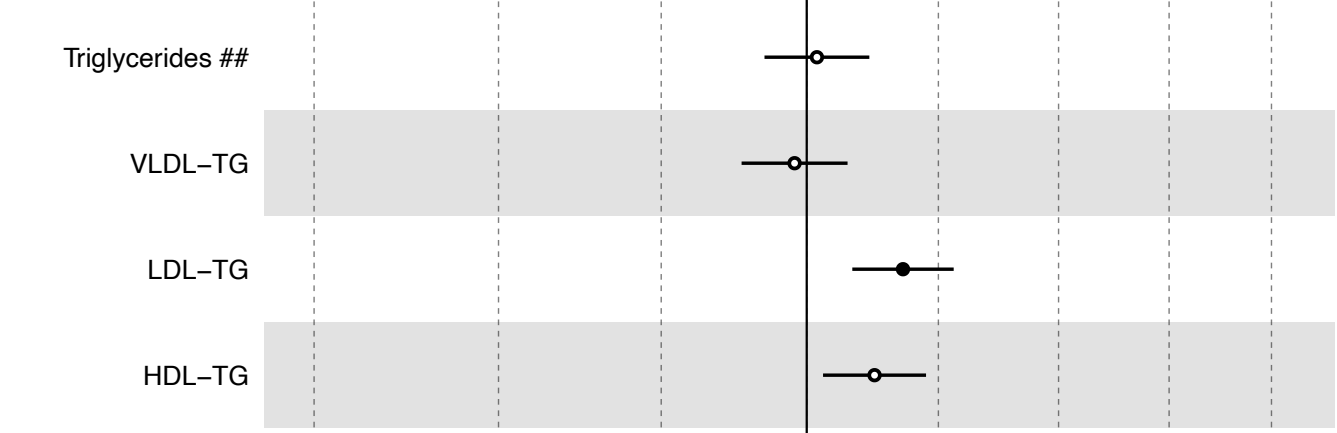

Lipoprotein particle sizes

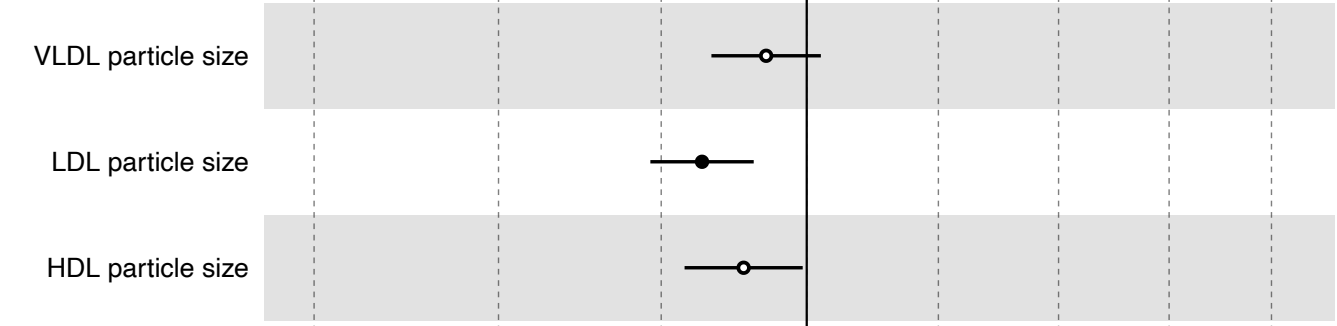

Apolipoproteins

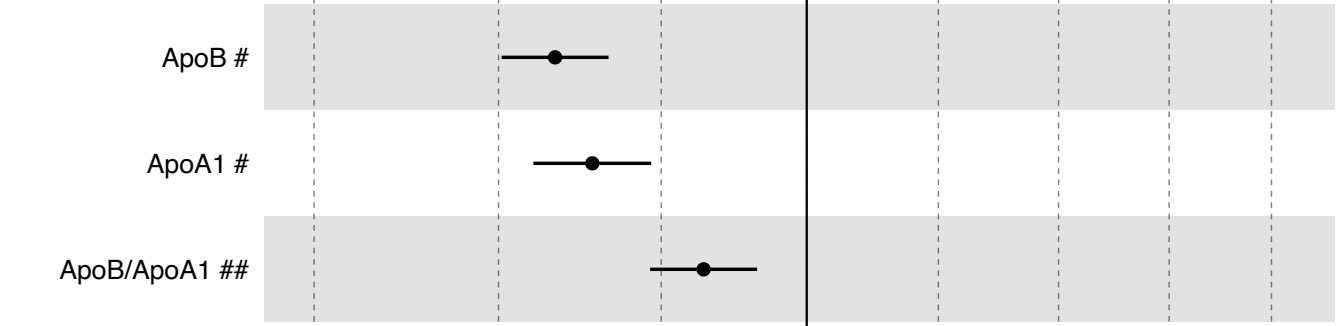

Glycolysis related metabolites

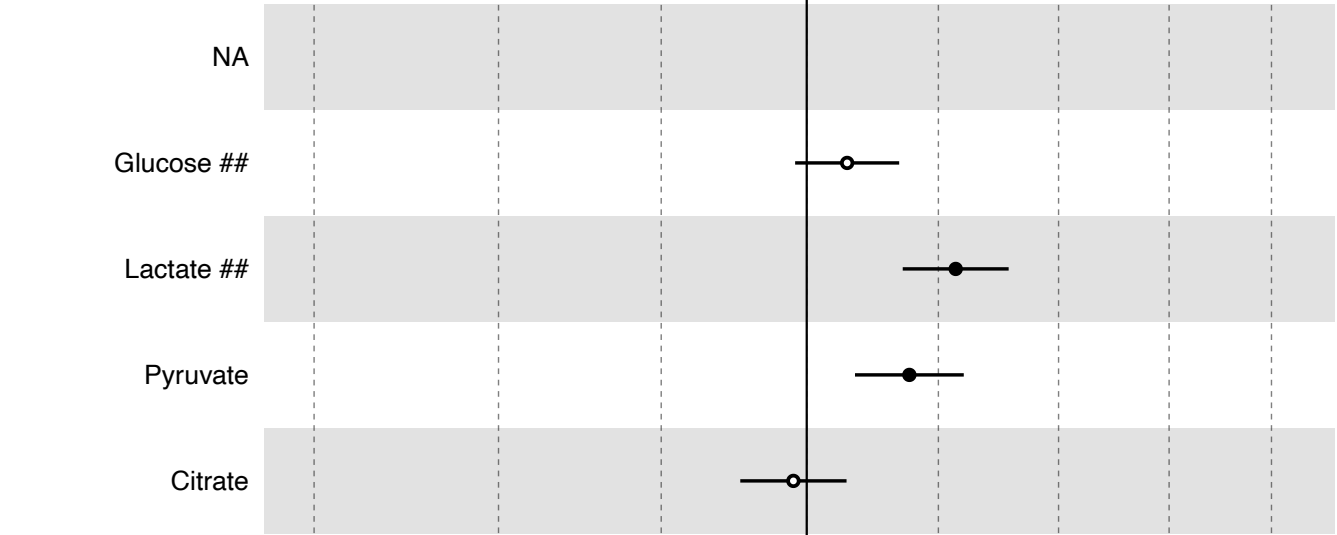

Fatty acids

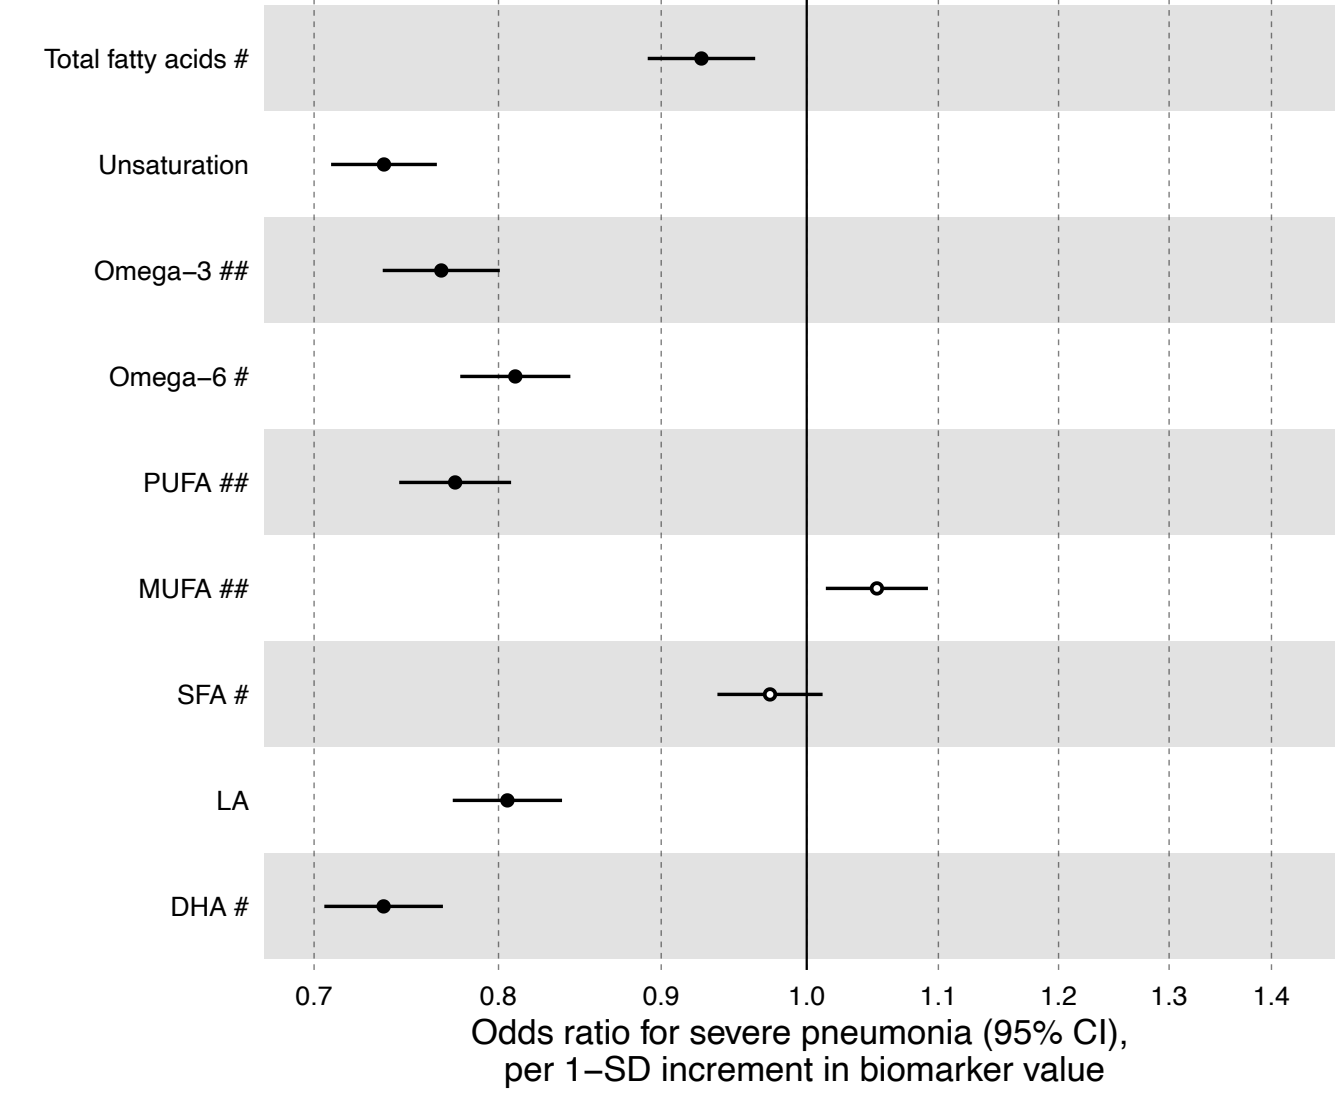

Amino acids

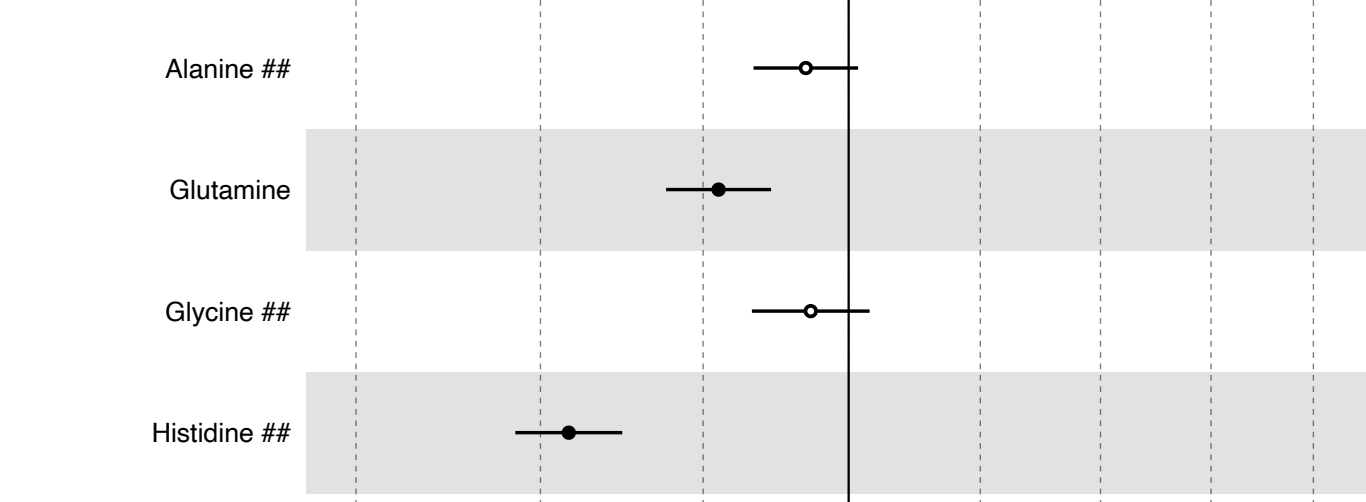

Branched-chain amino acids

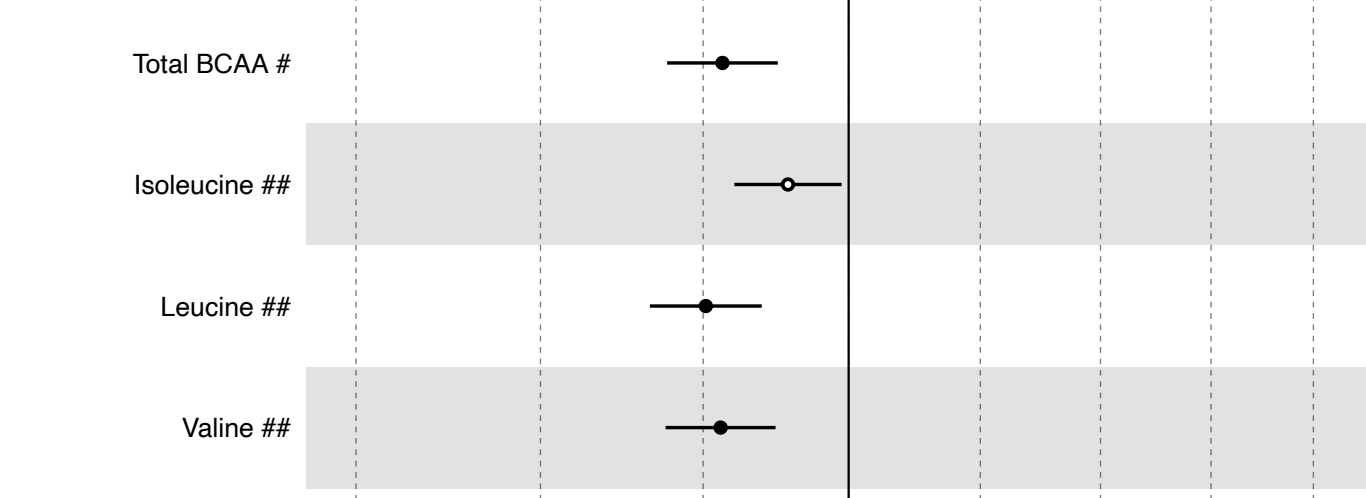

Aromatic amino acids

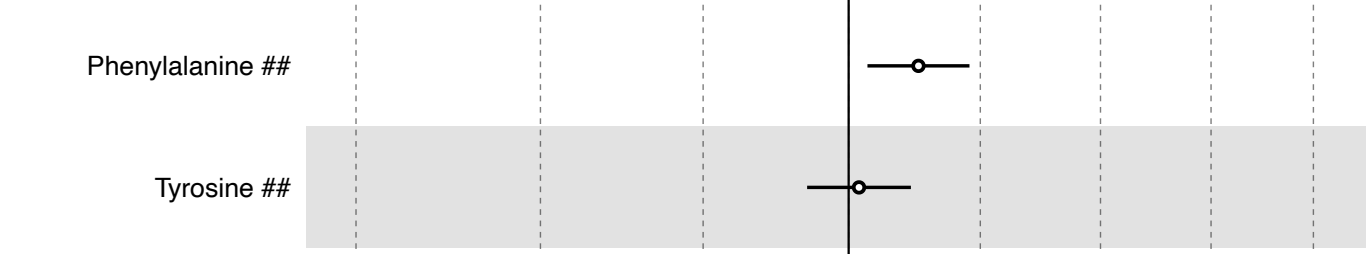

Ketone bodies

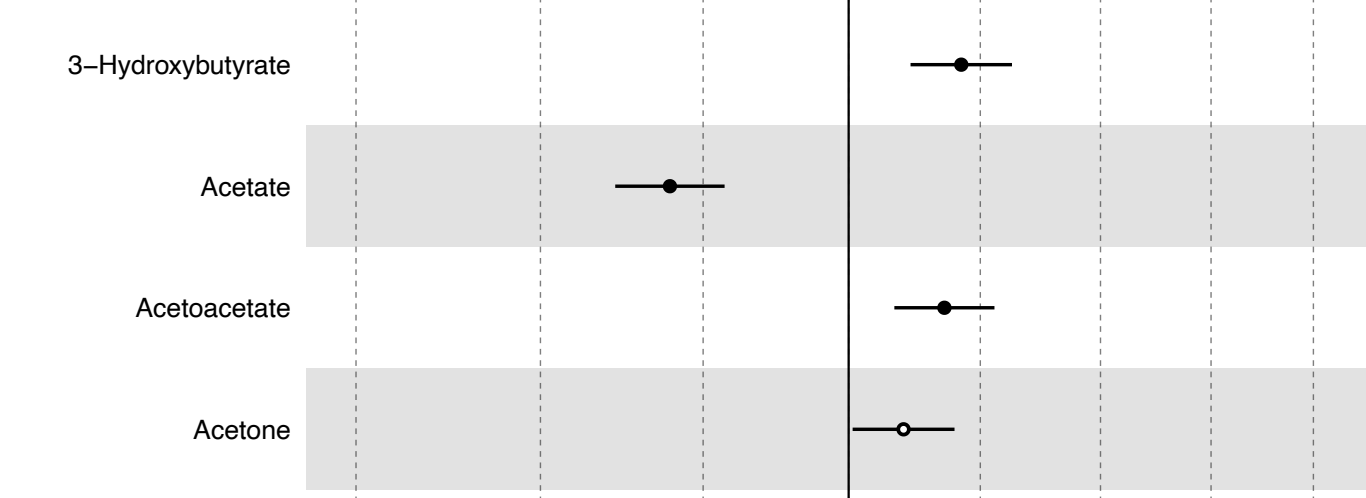

Fluid balance

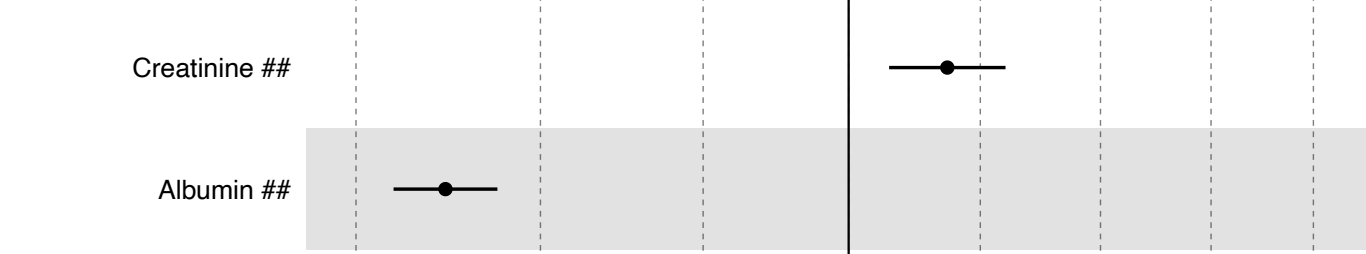

Inflammation

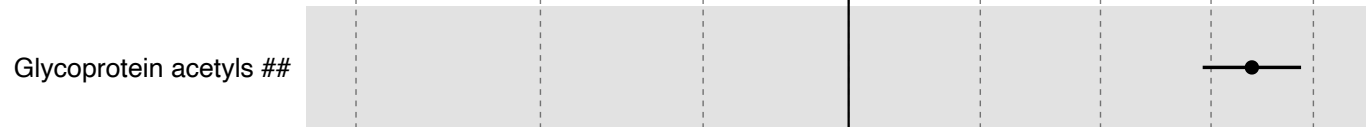

Fatty acid ratios

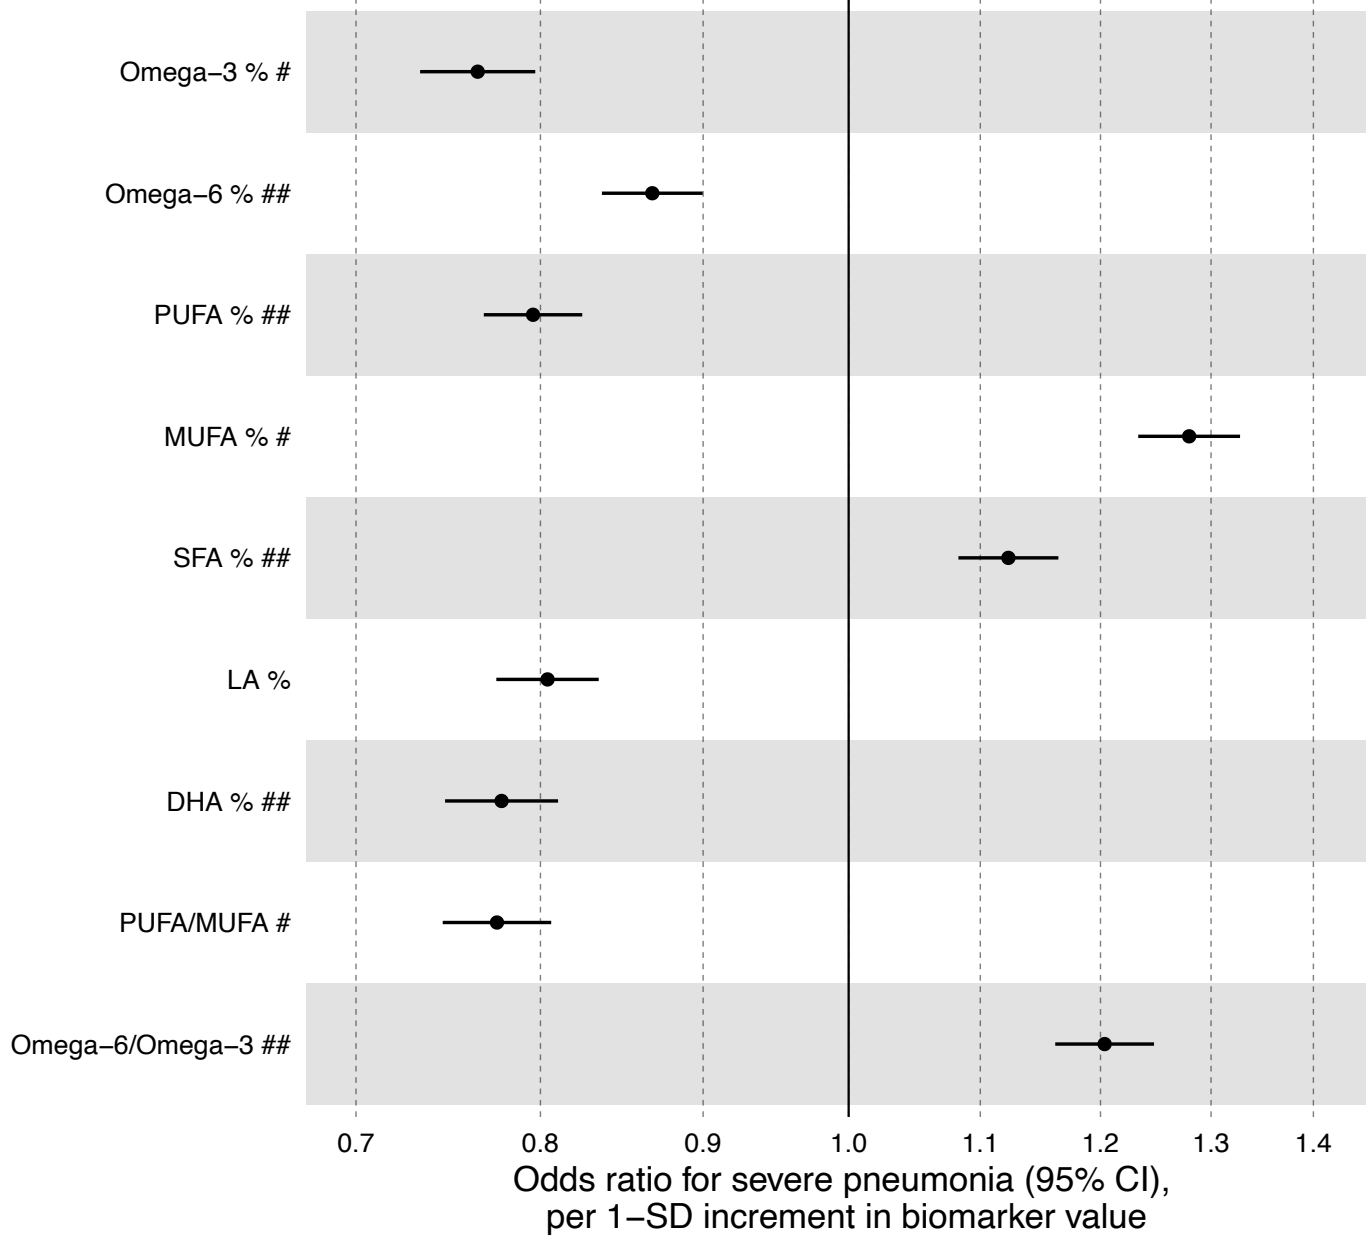

Supplement: supp [file elife-63033-supp-v1.zip]
