# Supplementary material for: Metabolic biomarker profiling for identification of susceptibility to severe pneumonia and COVID-19 in the general population
Source: eLife. 2021 May 4;10:e63033. doi: 10.7554/eLife.63033 (PMC8172246; doi:10.7554/eLife.63033)
Supplement: Supplementary file 2. — The table indicates mean concentrations and standard deviations used for biomarker scaling. The table also includes numerical results of odds ratios of all 249 biomarkers with severe pneumonia, with corresponding 95% confidence intervals and p-values, and whether each biomarker is clinically validated and included in the multi-biomarker infectious disease score. [file elife-63033-supp2.xlsx]

## Sheet: Sheet 1
Biomarker	Mean concentration	Standard deviation of concentration	Odds ratio with severe pneumonia	Beta	Standard Error	P-value	Clinically validated biomarker	Included in infectious disease score
3-Hydroxybutyrate	0.0500794	0.0349187	1.08495	0.0815321	0.018739	1.35558e-05	No	No
Acetate	0.0145704	0.00578293	0.878625	-0.129398	0.0201961	1.48347e-10	No	No
Acetoacetate	0.0114576	0.00838358	1.07179	0.0693309	0.0184879	0.000176786	No	No
Acetone	0.0137404	0.00393492	1.04056	0.0397605	0.0188227	0.0346548	No	No
Alanine	0.295826	0.0758841	0.969479	-0.0309963	0.0193225	0.108679	Yes	Yes
Albumin	38.9038	3.24057	0.746843	-0.291901	0.019177	2.55172e-52	Yes	Yes
ApoA1	1.43833	0.239717	0.856217	-0.155232	0.0217673	9.93404e-13	Yes	No
ApoB	0.839647	0.198369	0.83344	-0.182194	0.0197548	2.89525e-20	Yes	No
ApoB/ApoA1	0.597774	0.165739	0.928085	-0.0746325	0.0197708	0.000160082	Yes	Yes
Citrate	0.0620314	0.0119629	0.990404	-0.00964242	0.0196262	0.623213	No	No
Creatine	0.0351868	0.0190288	1.05119	0.0499182	0.0205342	0.0150583	No	No
Creatinine	0.0657356	0.0124064	1.07405	0.0714352	0.0214901	0.000887039	Yes	Yes
DHA	0.23293	0.0795232	0.736147	-0.306325	0.0219042	1.93133e-44	Yes	No
DHA %	2.00305	0.656318	0.777801	-0.251284	0.0208693	2.16706e-33	Yes	Yes
Glucose	3.46565	0.748464	1.02971	0.0292729	0.0192192	0.127732	Yes	Yes
Glutamine	0.529635	0.0793756	0.910134	-0.0941636	0.019387	1.19145e-06	No	No
Glycine	0.161942	0.0622739	0.972927	-0.0274466	0.0217348	0.206664	Yes	Yes
Glycoprotein acetyls	0.791338	0.115887	1.33902	0.291935	0.0181738	4.59897e-58	Yes	Yes
HDL particle size	9.64385	0.206283	0.955356	-0.045671	0.0218182	0.0363268	No	No
HDL-C	1.30243	0.321945	0.838266	-0.17642	0.0225931	5.78316e-15	Yes	No
HDL-CE	1.01299	0.251776	0.835532	-0.179687	0.0224631	1.25197e-15	No	No
HDL-FC	0.289399	0.072353	0.854184	-0.157608	0.0227102	3.9212e-12	No	No
HDL-L	2.98161	0.633591	0.866435	-0.143368	0.022262	1.19434e-10	No	No
HDL-P	0.0149882	0.00239044	0.817176	-0.2019	0.021141	1.29452e-21	No	No
HDL-PL	1.5358	0.315205	0.888932	-0.117734	0.0219629	8.29538e-08	No	No
HDL-TG	0.143096	0.0461118	1.05032	0.0490946	0.0190216	0.00985161	No	No
Histidine	0.0641791	0.0098198	0.816592	-0.202616	0.019749	1.07193e-24	Yes	Yes
IDL-C	0.832169	0.213372	0.788303	-0.237872	0.0199322	7.86456e-33	No	No
IDL-C %	67.7932	2.90438	0.777228	-0.252022	0.0167033	1.93777e-51	No	No
IDL-CE	0.613051	0.158484	0.783392	-0.244122	0.0199804	2.48926e-34	No	No
IDL-CE %	49.9127	2.42619	0.760589	-0.273662	0.0170954	1.12425e-57	No	No
IDL-FC	0.219117	0.05609	0.806111	-0.215534	0.0198115	1.4474e-27	No	No
IDL-FC %	17.8706	1.04312	0.901033	-0.104213	0.017986	6.86876e-09	No	No
IDL-L	1.2216	0.287395	0.808083	-0.21309	0.0199833	1.51007e-26	No	No
IDL-P	0.000308408	7.62233e-05	0.83627	-0.178804	0.0197018	1.13122e-19	No	No
IDL-PL	0.290471	0.0657006	0.822101	-0.195893	0.0200344	1.40241e-22	No	No
IDL-PL %	23.8572	0.898417	1.20903	0.189817	0.0187181	3.63929e-24	No	No
IDL-TG	0.0987126	0.0252089	1.08902	0.0852816	0.0187611	5.4763e-06	No	No
IDL-TG %	8.31305	2.2748	1.2828	0.249042	0.0167248	3.79284e-50	No	No
Isoleucine	0.0494782	0.0166642	0.957021	-0.0439304	0.0198279	0.02672	Yes	Yes
L-HDL-C	0.293692	0.166207	0.886298	-0.120702	0.022778	1.16416e-07	No	No
L-HDL-C %	44.1505	5.00877	0.867593	-0.142033	0.0179485	2.50558e-15	No	No
L-HDL-CE	0.226966	0.129271	0.882421	-0.125085	0.0227673	3.92751e-08	No	No
L-HDL-CE %	34.0844	4.41263	0.863907	-0.146291	0.0177782	1.89317e-16	No	No
L-HDL-FC	0.0667007	0.0372024	0.897108	-0.108579	0.0227576	1.83213e-06	No	No
L-HDL-FC %	10.0812	0.965266	0.938011	-0.0639939	0.0188762	0.000698445	No	No
L-HDL-L	0.644379	0.320213	0.897654	-0.10797	0.0227646	2.1068e-06	No	No
L-HDL-P	0.00138728	0.000760936	0.884011	-0.123286	0.0228936	7.23792e-08	No	No
L-HDL-PL	0.320632	0.150667	0.913473	-0.0905012	0.0225768	6.10822e-05	No	No
L-HDL-PL %	50.3873	2.79031	1.16614	0.153699	0.0177024	3.8757e-18	No	No
L-HDL-TG	0.0300143	0.0118037	1.00884	0.00880098	0.0199719	0.659453	No	No
L-HDL-TG %	5.46321	2.8148	1.10892	0.103384	0.0184346	2.04481e-08	No	No
L-LDL-C	1.11213	0.279888	0.77436	-0.255718	0.0199372	1.16946e-37	No	No
L-LDL-C %	71.0654	1.5659	0.723347	-0.323867	0.0170177	9.41735e-81	No	No
L-LDL-CE	0.820458	0.20532	0.777295	-0.251936	0.019976	1.81444e-36	No	No
L-LDL-CE %	52.4388	1.11957	0.756842	-0.2786	0.017778	2.38676e-55	No	No
L-LDL-FC	0.291675	0.0766076	0.772035	-0.258726	0.0198093	5.51221e-39	No	No
L-LDL-FC %	18.6144	1.26758	0.826363	-0.190721	0.0177295	5.47785e-27	No	No
L-LDL-L	1.5608	0.373034	0.788801	-0.237241	0.0198972	8.94542e-33	No	No
L-LDL-P	0.000725648	0.000174319	0.825483	-0.191787	0.0198875	5.23139e-22	No	No
L-LDL-PL	0.352608	0.0817978	0.790732	-0.234796	0.0197416	1.28011e-32	No	No
L-LDL-PL %	22.6369	0.747678	1.07093	0.0685266	0.0191575	0.000347558	No	No
L-LDL-TG	0.0958294	0.0246307	1.07963	0.0766163	0.0187421	4.3524e-05	No	No
L-LDL-TG %	6.27822	1.5513	1.32222	0.279313	0.0165149	3.62391e-64	No	No
L-VLDL-C	0.097143	0.0470678	0.935466	-0.0667107	0.0199853	0.000843868	No	No
L-VLDL-C %	30.4094	4.16622	0.972117	-0.0282791	0.0194958	0.146913	No	No
L-VLDL-CE	0.0509341	0.0231	0.911726	-0.0924158	0.0199584	3.64913e-06	No	No
L-VLDL-CE %	16.3999	3.38282	0.946176	-0.0553264	0.0198671	0.00535564	No	No
L-VLDL-FC	0.046193	0.0245699	0.958823	-0.0420484	0.019978	0.0353144	No	No
L-VLDL-FC %	14.0647	1.15102	1.10009	0.0953928	0.0200779	2.02275e-06	No	No
L-VLDL-L	0.327199	0.173558	0.948924	-0.0524264	0.019985	0.0087087	No	No
L-VLDL-P	1.01671e-05	5.46116e-06	0.965109	-0.0355145	0.0198871	0.0741309	No	No
L-VLDL-PL	0.0658522	0.0389101	0.978592	-0.0216407	0.01983	0.275137	No	No
L-VLDL-PL %	19.5047	2.37657	1.13297	0.124843	0.022119	1.65986e-08	No	No
L-VLDL-TG	0.164066	0.0900834	0.945397	-0.0561499	0.0199897	0.00497048	No	No
L-VLDL-TG %	50.2678	5.06485	0.948706	-0.0526563	0.0198941	0.00812494	No	No
LA	3.41386	0.682	0.805161	-0.216712	0.0201819	6.75203e-27	No	No
LA %	29.0447	3.44051	0.804116	-0.218012	0.0189095	9.39891e-31	No	No
Lactate	3.80412	1.07378	1.11388	0.107845	0.0195653	3.54627e-08	Yes	Yes
LDL particle size	23.9173	0.0878861	0.927007	-0.0757936	0.0190914	7.18588e-05	No	No
LDL-C	2.50728	0.724645	0.785985	-0.240817	0.0197292	2.88321e-34	Yes	Yes
LDL-CE	1.25123	0.317893	0.789134	-0.236819	0.0198637	9.06425e-33	No	No
LDL-FC	0.457782	0.119504	0.774256	-0.255852	0.0197013	1.45829e-38	No	No
LDL-L	2.45115	0.591655	0.797726	-0.22599	0.0198144	3.93291e-30	No	No
LDL-P	0.00118484	0.000279494	0.826061	-0.191086	0.0198035	4.95885e-22	No	No
LDL-PL	0.59844	0.138963	0.800435	-0.222601	0.0197297	1.60087e-29	No	No
LDL-TG	0.143258	0.0393706	1.07219	0.0696998	0.0187242	0.000197304	No	No
Leucine	0.100326	0.026904	0.901766	-0.1034	0.0206552	5.55797e-07	Yes	Yes
M-HDL-C	0.488135	0.120764	0.862361	-0.148082	0.0216137	7.31856e-12	No	No
M-HDL-C %	47.4577	2.95932	0.850914	-0.161444	0.0190173	2.07846e-17	No	No
M-HDL-CE	0.402391	0.0969172	0.863723	-0.146503	0.0215001	9.48833e-12	No	No
M-HDL-CE %	39.1935	2.5605	0.880645	-0.127101	0.0187256	1.14073e-11	No	No
M-HDL-FC	0.0857426	0.0243853	0.863043	-0.147291	0.0219106	1.78778e-11	No	No
M-HDL-FC %	8.2661	0.703856	0.805263	-0.216586	0.0206584	1.02137e-25	No	No
M-HDL-L	1.02322	0.221717	0.888982	-0.117678	0.0212937	3.26823e-08	No	No
M-HDL-P	0.00380895	0.000914799	0.870873	-0.138259	0.0215321	1.35308e-10	No	No
M-HDL-PL	0.48133	0.098945	0.908596	-0.0958542	0.0210421	5.22953e-06	No	No
M-HDL-PL %	47.168	1.26716	1.22351	0.201724	0.0187505	5.41641e-27	No	No
M-HDL-TG	0.0536831	0.0186099	1.04614	0.045111	0.0190972	0.0181681	No	No
M-HDL-TG %	5.3732	1.81362	1.12903	0.121359	0.0191377	2.27767e-10	No	No
M-LDL-C	0.418571	0.115975	0.802229	-0.220361	0.0197731	7.619e-29	No	No
M-LDL-C %	68.4926	1.49826	0.780048	-0.248399	0.0166509	2.51327e-50	No	No
M-LDL-CE	0.301246	0.0863958	0.815396	-0.204082	0.0198416	8.18628e-25	No	No
M-LDL-CE %	49.1558	1.89446	0.889013	-0.117643	0.0190339	6.38057e-10	No	No
M-LDL-FC	0.117315	0.0318556	0.779141	-0.249564	0.0196627	6.53007e-37	No	No
M-LDL-FC %	19.3137	1.86314	0.853178	-0.158787	0.0186127	1.44931e-17	No	No
M-LDL-L	0.609711	0.163011	0.814427	-0.205271	0.0198098	3.68895e-25	No	No
M-LDL-P	0.000290999	7.51651e-05	0.829127	-0.187381	0.0197973	2.93491e-21	No	No
M-LDL-PL	0.158779	0.04139	0.813936	-0.205874	0.0198261	2.93358e-25	No	No
M-LDL-PL %	26.1053	0.812084	1.06466	0.0626592	0.0194921	0.00130627	No	No
M-LDL-TG	0.032222	0.00987055	1.06239	0.0605166	0.018758	0.00125459	No	No
M-LDL-TG %	5.39914	1.3965	1.28671	0.25209	0.0165287	1.60359e-52	No	No
M-VLDL-C	0.169188	0.0653059	0.815643	-0.203779	0.0198845	1.2065e-24	No	No
M-VLDL-C %	30.2425	6.72577	0.870378	-0.138828	0.0189229	2.19227e-13	No	No
M-VLDL-CE	0.091051	0.0380186	0.807979	-0.213219	0.0197568	3.74729e-27	No	No
M-VLDL-CE %	16.4503	5.04674	0.869982	-0.139283	0.0190965	3.0166e-13	No	No
M-VLDL-FC	0.0781278	0.0292288	0.83588	-0.179271	0.0199789	2.88515e-19	No	No
M-VLDL-FC %	13.7962	1.7288	0.879055	-0.128907	0.0186235	4.46132e-12	No	No
M-VLDL-L	0.566453	0.203261	0.865445	-0.144511	0.0200455	5.63036e-13	No	No
M-VLDL-P	3.43416e-05	1.21648e-05	0.85315	-0.15882	0.0200229	2.15773e-15	No	No
M-VLDL-PL	0.127031	0.0471804	0.851109	-0.161215	0.0199453	6.32831e-16	No	No
M-VLDL-PL %	22.3462	1.77936	0.894875	-0.111071	0.0185109	1.96918e-09	No	No
M-VLDL-TG	0.270073	0.113333	0.928849	-0.0738089	0.0200078	0.000225127	No	No
M-VLDL-TG %	47.4178	8.39427	1.14671	0.136895	0.0187723	3.04535e-13	No	No
MUFA	2.81055	0.799217	1.0521	0.0507913	0.0188516	0.00705432	Yes	Yes
MUFA %	23.4969	2.67898	1.27957	0.246521	0.0188061	2.94112e-39	Yes	No
non-HDL-C	3.25798	0.833057	0.801643	-0.221092	0.0198324	7.32179e-29	No	No
Omega-3	0.523512	0.21297	0.76753	-0.264578	0.0216256	2.03438e-34	Yes	Yes
Omega-3 %	4.39927	1.50532	0.76447	-0.268573	0.0212696	1.49785e-36	Yes	No
Omega-6	4.45112	0.678752	0.809782	-0.210991	0.0203351	3.19891e-25	Yes	No
Omega-6 %	38.0938	3.63048	0.867483	-0.14216	0.0186113	2.19993e-14	Yes	Yes
Omega-6/Omega-3	9.62779	3.60778	1.2036	0.185319	0.0182445	3.06715e-24	Yes	Yes
Phenylalanine	0.0449108	0.00990573	1.05184	0.0505401	0.0188413	0.00730956	Yes	Yes
Phosphatidylcholines	2.07534	0.372351	0.820648	-0.197662	0.0210554	6.13381e-21	No	No
Phosphoglycerides	2.25089	0.395193	0.844053	-0.16954	0.0208327	4.01288e-16	No	No
PUFA	4.97684	0.799007	0.775282	-0.254528	0.0206657	7.3875e-35	Yes	Yes
PUFA %	42.511	3.76766	0.795728	-0.228497	0.0181774	3.07233e-36	Yes	Yes
PUFA/MUFA	1.84774	0.350432	0.775212	-0.254618	0.0200392	5.47455e-37	Yes	No
Pyruvate	0.0776454	0.0272326	1.07715	0.0743202	0.0200944	0.000216839	No	No
Remnant-C	1.54885	0.414677	0.828287	-0.188396	0.019783	1.68092e-21	No	No
S-HDL-C	0.438675	0.059784	0.824281	-0.193244	0.0197629	1.39798e-22	No	No
S-HDL-C %	38.3214	1.8429	0.833946	-0.181587	0.0183948	5.52432e-23	No	No
S-HDL-CE	0.325378	0.0462734	0.830484	-0.185747	0.0196249	2.93925e-21	No	No
S-HDL-CE %	28.4278	1.82981	0.860054	-0.15076	0.0185729	4.77086e-16	No	No
S-HDL-FC	0.113323	0.0158604	0.853646	-0.158239	0.0201392	3.92648e-15	No	No
S-HDL-FC %	9.89236	0.5193	0.886393	-0.120595	0.020665	5.3559e-09	No	No
S-HDL-L	1.14589	0.155129	0.87857	-0.12946	0.0197591	5.68137e-11	No	No
S-HDL-P	0.00956056	0.00128055	0.829542	-0.186881	0.019713	2.54075e-21	No	No
S-HDL-PL	0.654743	0.0914862	0.896804	-0.108918	0.0198259	3.93553e-08	No	No
S-HDL-PL %	57.122	1.23096	1.13571	0.127256	0.0196756	9.94968e-11	No	No
S-HDL-TG	0.0524054	0.0172881	1.07066	0.0682789	0.0192149	0.000380239	No	No
S-HDL-TG %	4.55539	1.30234	1.15812	0.146795	0.0192716	2.59263e-14	No	No
S-LDL-C	0.178281	0.0437056	0.808296	-0.212827	0.0197241	3.82887e-27	No	No
S-LDL-C %	63.3156	1.90997	0.775795	-0.253867	0.0169881	1.70951e-50	No	No
S-LDL-CE	0.129489	0.0327257	0.822631	-0.195248	0.0198491	7.82949e-23	No	No
S-LDL-CE %	45.9225	2.07941	0.879302	-0.128627	0.0190699	1.52995e-11	No	No
S-LDL-FC	0.0487892	0.0123553	0.792197	-0.232945	0.0191863	6.38607e-34	No	No
S-LDL-FC %	17.4096	1.86865	0.863973	-0.146214	0.0177804	1.97894e-16	No	No
S-LDL-L	0.280617	0.0643779	0.824983	-0.192393	0.0197206	1.73983e-22	No	No
S-LDL-P	0.0001682	3.71361e-05	0.841219	-0.172903	0.0197593	2.12518e-18	No	No
S-LDL-PL	0.0870489	0.0183588	0.834918	-0.180422	0.0194894	2.09383e-20	No	No
S-LDL-PL %	31.1938	1.75372	1.13499	0.126625	0.0190044	2.684e-11	No	No
S-LDL-TG	0.0152129	0.00546816	1.04297	0.0420756	0.0189315	0.0262487	No	No
S-LDL-TG %	5.46235	1.65979	1.19402	0.177322	0.0173354	1.47209e-24	No	No
S-VLDL-C	0.155258	0.0509573	0.889363	-0.11725	0.0197852	3.10151e-09	No	No
S-VLDL-C %	38.1875	4.66137	0.87521	-0.133291	0.018754	1.18318e-12	No	No
S-VLDL-CE	0.0972887	0.0327444	0.911933	-0.0921891	0.0197334	2.98682e-06	No	No
S-VLDL-CE %	23.8273	2.73803	0.935672	-0.0664907	0.0187436	0.000389068	No	No
S-VLDL-FC	0.0579662	0.0186078	0.849928	-0.162603	0.019869	2.75128e-16	No	No
S-VLDL-FC %	14.362	2.21999	0.811864	-0.208422	0.0192909	3.2893e-27	No	No
S-VLDL-L	0.407537	0.128788	0.930042	-0.0725258	0.0198244	0.000253786	No	No
S-VLDL-P	3.89179e-05	1.26873e-05	0.942798	-0.0589036	0.0197817	0.00290442	No	No
S-VLDL-PL	0.0960502	0.0296639	0.883392	-0.123986	0.0198456	4.16928e-10	No	No
S-VLDL-PL %	23.6968	2.07634	0.820586	-0.197736	0.0193802	1.92254e-24	No	No
S-VLDL-TG	0.156104	0.0592734	1.01113	0.011064	0.01944	0.569266	No	No
S-VLDL-TG %	38.1161	6.62944	1.16735	0.154738	0.0188892	2.57147e-16	No	No
SFA	4.03526	0.928416	0.973775	-0.0265752	0.0194252	0.171287	Yes	No
SFA %	33.9904	1.94374	1.12261	0.115653	0.0184665	3.78021e-10	Yes	Yes
Size-specific LDL-C	1.70902	0.43283	0.783022	-0.244594	0.0198254	5.69462e-35	No	No
Sphingomyelins	0.44183	0.0712666	0.84661	-0.166515	0.0205716	5.75431e-16	No	No
TG/PG	0.57589	0.22493	1.09149	0.0875431	0.0195939	7.9004e-06	No	No
Total BCAA	0.352571	0.0818662	0.912693	-0.091356	0.0204512	7.93109e-06	Yes	No
Total cholines	2.52914	0.407576	0.824188	-0.193356	0.0208664	1.92522e-20	No	No
Total fatty acids	11.8295	2.36638	0.926605	-0.0762279	0.0198482	0.000122763	Yes	No
Total-C	4.56042	0.932943	0.777783	-0.251307	0.0200115	3.58625e-36	Yes	Yes
Total-CE	3.31145	0.671097	0.772691	-0.257877	0.0200488	7.31999e-38	No	No
Total-FC	1.24909	0.267405	0.793534	-0.231259	0.0199602	4.85431e-31	No	No
Total-L	8.74857	1.63699	0.825432	-0.191848	0.0199758	7.69024e-22	No	No
Total-P	0.016625	0.00249492	0.799894	-0.223277	0.0209843	1.93807e-26	No	No
Total-PL	2.8938	0.468374	0.8234	-0.194314	0.0204786	2.34141e-21	No	No
Triglycerides	1.29119	0.561375	1.00741	0.00737924	0.0193682	0.703204	Yes	Yes
Tyrosine	0.061316	0.0137468	1.00753	0.00750331	0.0191629	0.695388	Yes	Yes
Unsaturation	1.36073	0.0803099	0.736339	-0.306065	0.0195293	2.3486e-55	No	No
Valine	0.202703	0.0414281	0.911471	-0.0926957	0.0203066	4.99947e-06	Yes	Yes
VLDL particle size	38.6111	1.25851	0.971045	-0.0293828	0.0202141	0.146063	No	No
VLDL-C	0.716629	0.245508	0.890226	-0.11628	0.0197908	4.21668e-09	Yes	No
VLDL-CE	0.427488	0.142632	0.876335	-0.132007	0.0197581	2.37071e-11	No	No
VLDL-FC	0.289134	0.106581	0.913079	-0.0909325	0.0198447	4.60104e-06	No	No
VLDL-L	2.09282	0.850924	0.947357	-0.0540791	0.0198172	0.00635454	No	No
VLDL-P	0.000143474	4.39485e-05	0.92088	-0.0824252	0.0197445	2.98521e-05	No	No
VLDL-PL	0.468638	0.179484	0.940044	-0.0618286	0.0197761	0.00176946	No	No
VLDL-TG	0.905891	0.471093	0.99124	-0.00879836	0.0195704	0.653017	No	No
XL-HDL-C	0.0814667	0.0338239	0.896283	-0.109499	0.0221434	7.61486e-07	No	No
XL-HDL-C %	49.7823	4.16737	0.904118	-0.100795	0.0204998	8.79258e-07	No	No
XL-HDL-CE	0.0579921	0.0271857	0.885155	-0.121992	0.0224328	5.38446e-08	No	No
XL-HDL-CE %	34.6917	2.79932	0.825118	-0.192229	0.018399	1.4997e-25	No	No
XL-HDL-FC	0.0235039	0.00697793	0.938314	-0.0636708	0.0209612	0.00238508	No	No
XL-HDL-FC %	15.1722	3.1463	1.0769	0.0740855	0.0201561	0.000237309	No	No
XL-HDL-L	0.167114	0.0773521	0.919387	-0.0840483	0.0221054	0.000143441	No	No
XL-HDL-P	0.000230584	9.1869e-05	0.895726	-0.110121	0.022248	7.43269e-07	No	No
XL-HDL-PL	0.0786665	0.0434596	0.935558	-0.0666118	0.0220205	0.00248645	No	No
XL-HDL-PL %	45.2896	5.29071	1.04109	0.0402693	0.020809	0.0529672	No	No
XL-HDL-TG	0.00702669	0.00259518	1.01562	0.0154993	0.0192713	0.421242	No	No
XL-HDL-TG %	4.87722	2.62402	1.07082	0.0684251	0.0186856	0.000250337	No	No
XL-VLDL-C	0.0535675	0.0284127	0.95059	-0.0506721	0.0199286	0.0110005	No	No
XL-VLDL-C %	29.2103	7.17445	0.917248	-0.0863774	0.0213641	5.2748e-05	No	No
XL-VLDL-CE	0.0298368	0.0145639	0.926991	-0.0758119	0.0199603	0.000145793	No	No
XL-VLDL-CE %	17.0422	5.80554	0.910878	-0.0933459	0.0215256	1.44766e-05	No	No
XL-VLDL-FC	0.0237112	0.0142305	0.978013	-0.0222319	0.0197817	0.261072	No	No
XL-VLDL-FC %	12.1313	1.52705	0.945122	-0.0564409	0.0206629	0.00630463	No	No
XL-VLDL-L	0.202746	0.131968	0.993965	-0.0060533	0.0196498	0.758037	No	No
XL-VLDL-P	3.46711e-06	2.23891e-06	0.996102	-0.00390561	0.0196766	0.842661	No	No
XL-VLDL-PL	0.0387103	0.0257122	0.99148	-0.00855632	0.0196988	0.664029	No	No
XL-VLDL-PL %	18.8666	1.54517	1.00706	0.00703265	0.0202128	0.727892	No	No
XL-VLDL-TG	0.110381	0.0796776	1.0084	0.00836133	0.0194713	0.667619	No	No
XL-VLDL-TG %	52.1318	7.58323	1.08361	0.0802943	0.0206382	0.000100007	No	No
XS-VLDL-C	0.184853	0.0492059	0.87584	-0.132571	0.0199498	3.02691e-11	No	No
XS-VLDL-C %	51.513	4.55933	0.798813	-0.224628	0.0179317	5.31878e-36	No	No
XS-VLDL-CE	0.127109	0.0350979	0.854934	-0.156731	0.0200179	4.89771e-15	No	No
XS-VLDL-CE %	35.4142	4.1207	0.789899	-0.235851	0.0181159	9.54388e-39	No	No
XS-VLDL-FC	0.0577377	0.0146983	0.928312	-0.0743878	0.0197405	0.000164375	No	No
XS-VLDL-FC %	16.103	0.578882	0.900249	-0.105084	0.0177425	3.16617e-09	No	No
XS-VLDL-L	0.358025	0.0877102	0.943061	-0.0586243	0.0197367	0.00297496	No	No
XS-VLDL-P	5.48514e-05	1.36287e-05	0.935693	-0.0664676	0.0196567	0.000721117	No	No
XS-VLDL-PL	0.104629	0.025989	0.975032	-0.0252845	0.0195362	0.195583	No	No
XS-VLDL-PL %	29.2232	0.864688	1.36433	0.310665	0.0187298	8.70119e-62	No	No
XS-VLDL-TG	0.0684126	0.0206506	1.09182	0.0878419	0.0187507	2.80339e-06	No	No
XS-VLDL-TG %	19.2591	4.03378	1.20601	0.187321	0.0180378	2.90452e-25	No	No
XXL-VLDL-C	0.0564525	0.0421157	1.03422	0.0336506	0.0192548	0.0805245	No	No
XXL-VLDL-C %	27.1964	7.15141	0.987202	-0.0128801	0.0205698	0.531206	No	No
XXL-VLDL-CE	0.0311962	0.023202	1.02773	0.027353	0.0193613	0.157725	No	No
XXL-VLDL-CE %	15.0253	4.90974	0.982945	-0.0172016	0.0204831	0.401023	No	No
XXL-VLDL-FC	0.0252401	0.0190892	1.04313	0.0422251	0.0191167	0.0271882	No	No
XXL-VLDL-FC %	12.1151	2.777	1.002	0.00200176	0.0205181	0.922281	No	No
XXL-VLDL-L	0.228691	0.197999	1.04406	0.0431195	0.0189795	0.0230928	No	No
XXL-VLDL-P	1.69411e-06	1.47759e-06	1.04871	0.0475635	0.0189721	0.0121751	No	No
XXL-VLDL-PL	0.0360121	0.0311495	1.05656	0.0550137	0.018955	0.00370402	No	No
XXL-VLDL-PL %	15.8184	2.12111	1.10216	0.0972727	0.0203748	1.80455e-06	No	No
XXL-VLDL-TG	0.135863	0.125383	1.04095	0.0401298	0.0189449	0.0341552	No	No
XXL-VLDL-TG %	57.6205	8.90104	0.967142	-0.0334101	0.020351	0.100653	No	No
