# Supplementary figures and images for: Metabolic biomarker profiling for identification of susceptibility to severe pneumonia and COVID-19 in the general population
Source: eLife journal article supplement (doi:10.7554/elife.63033), 2021-05-04

**A**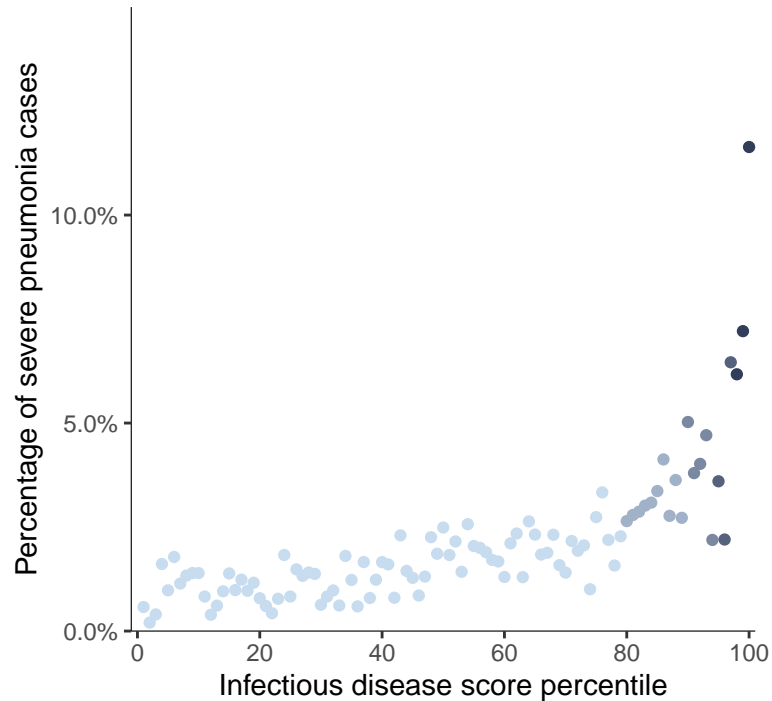**B**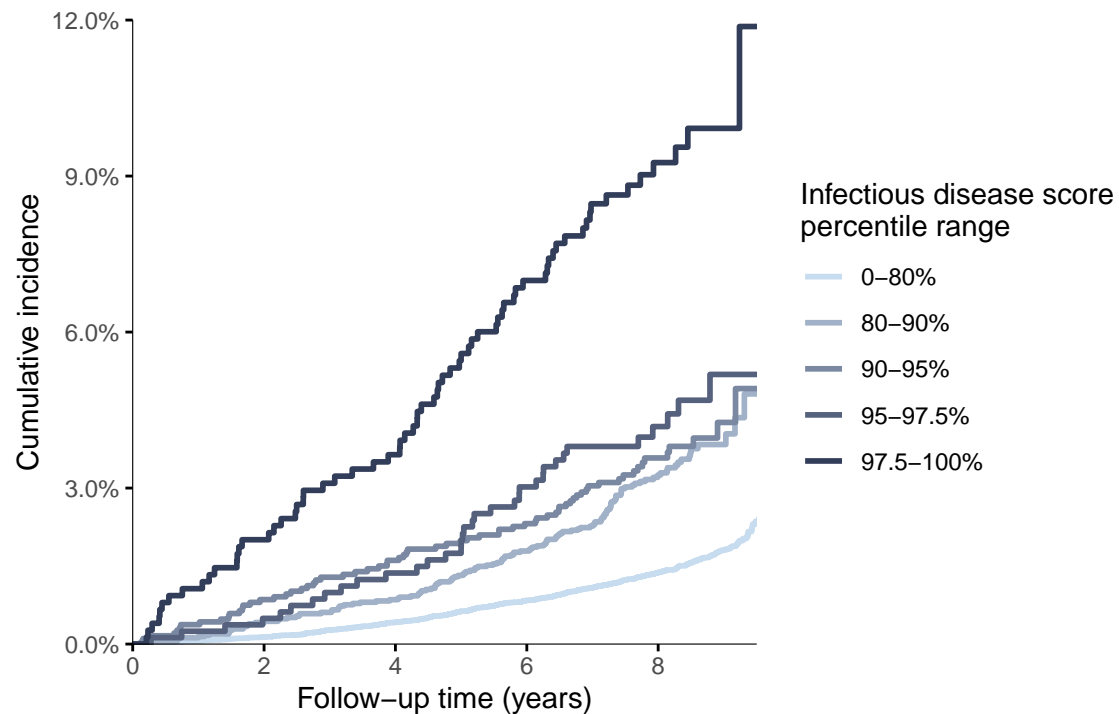

Supplement: supp [file elife-63033-supp-v1.zip]

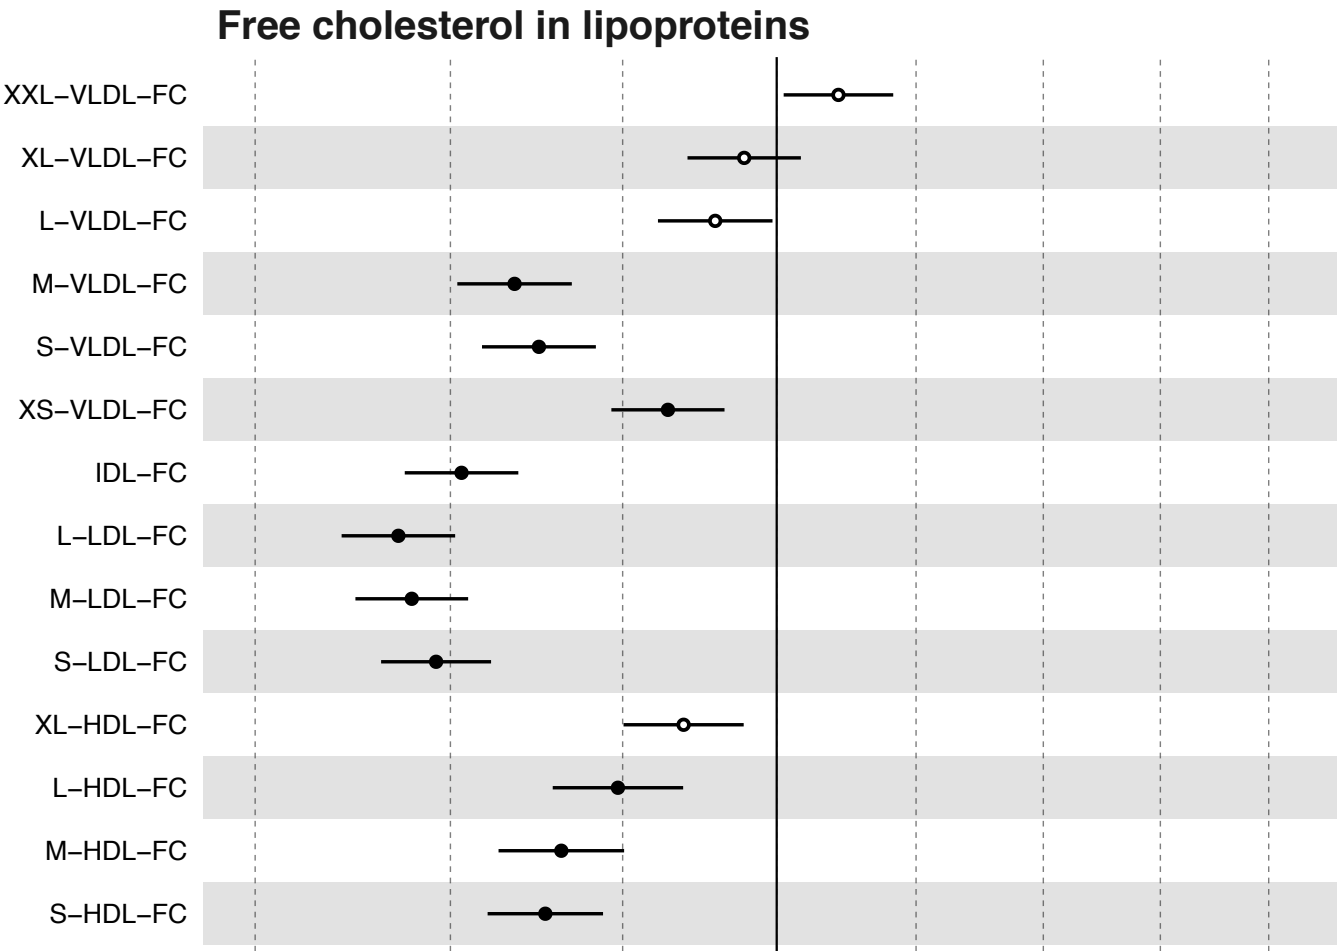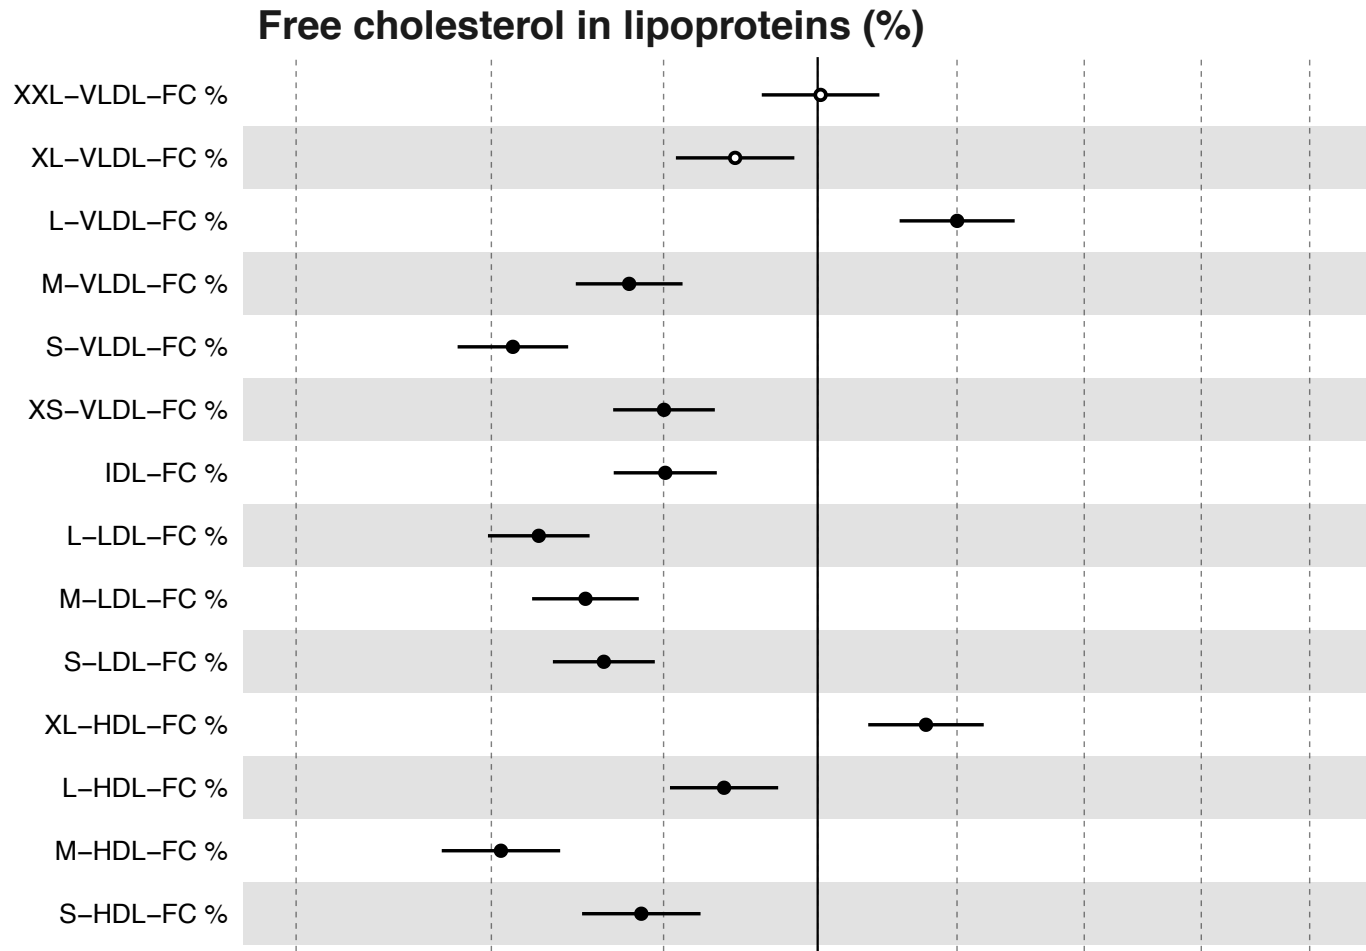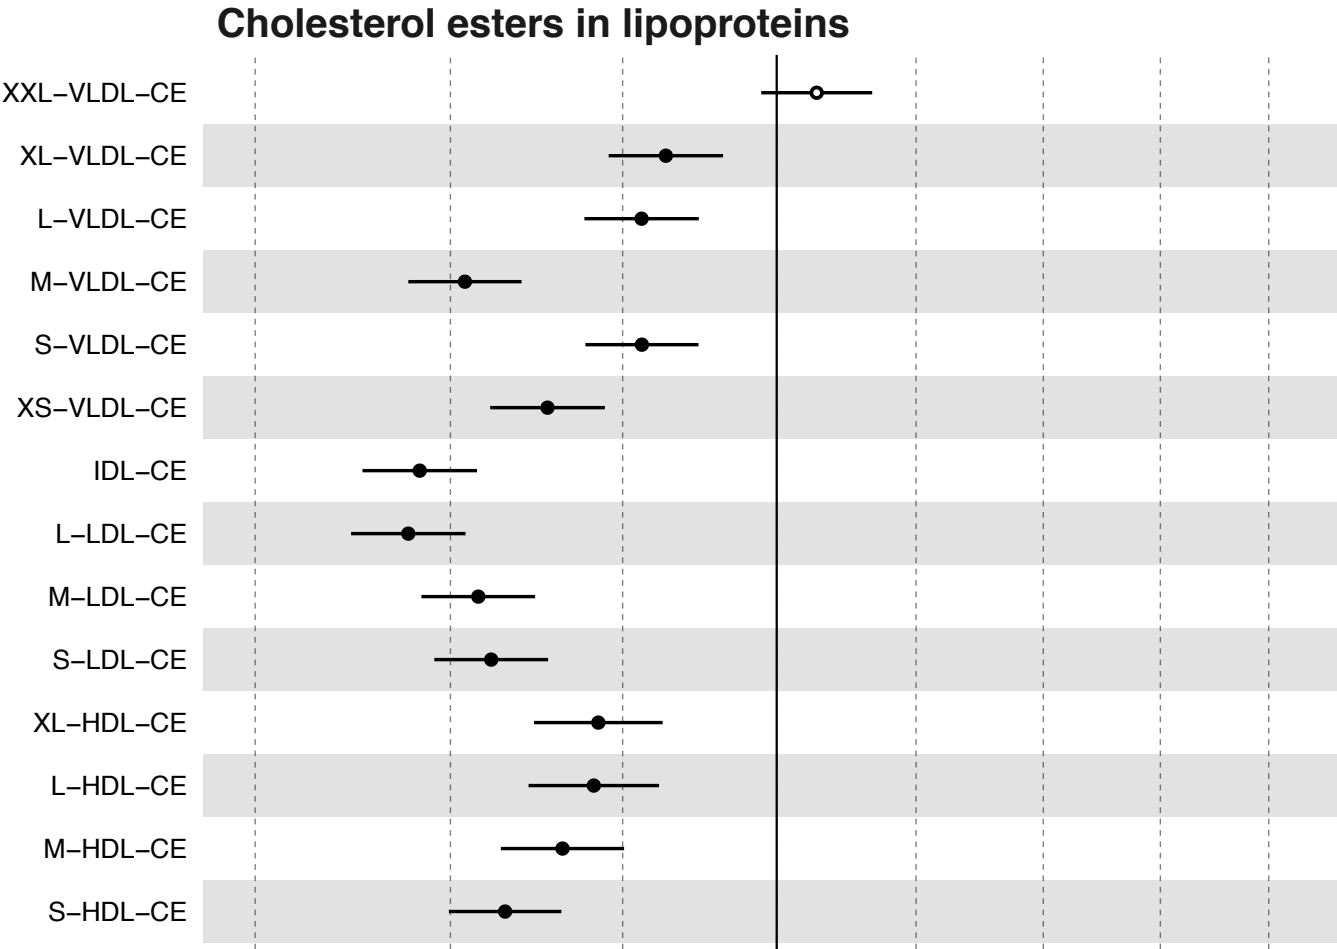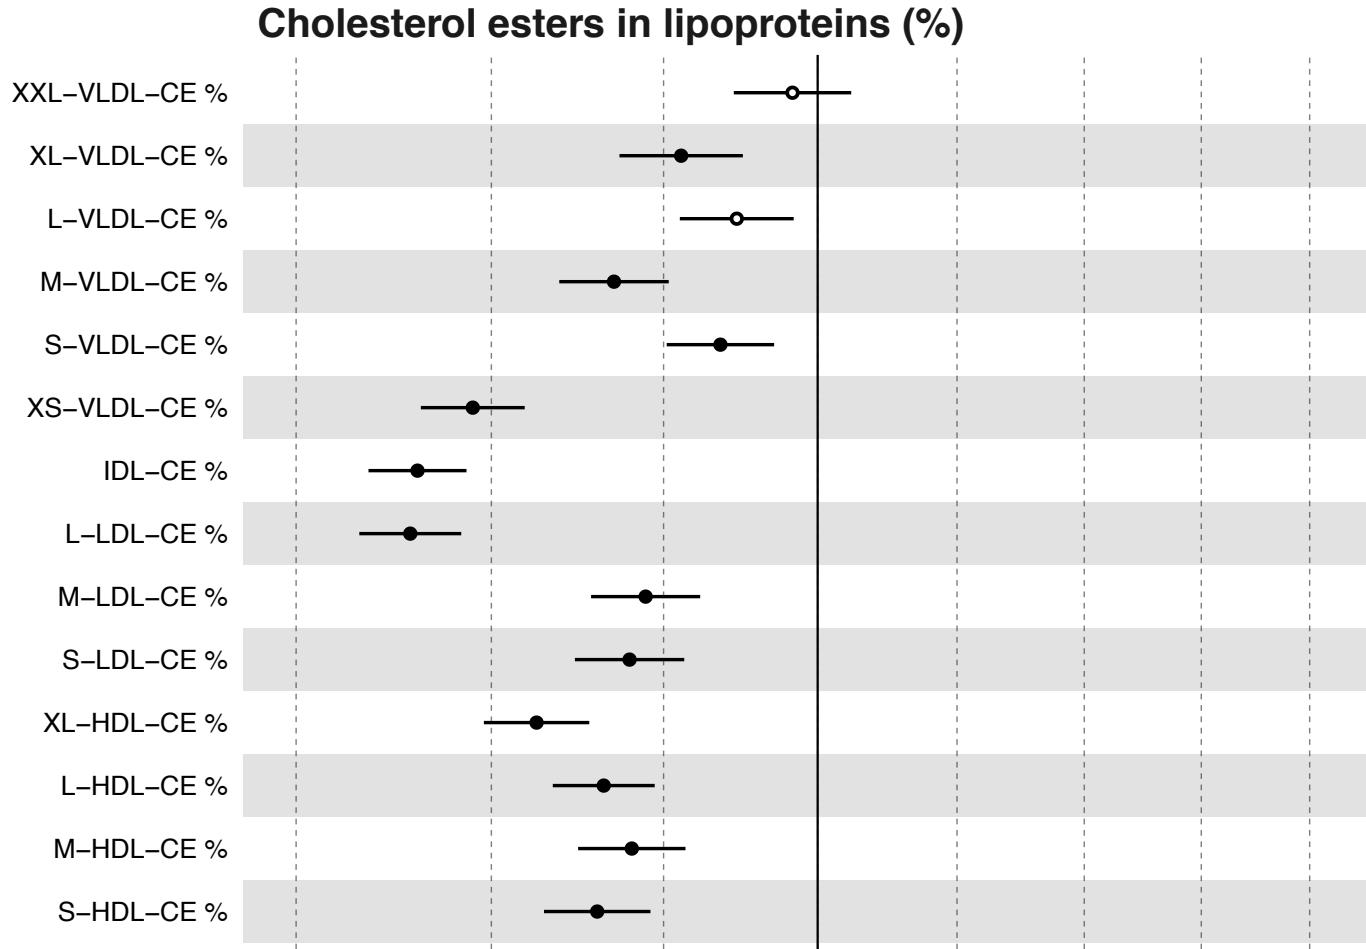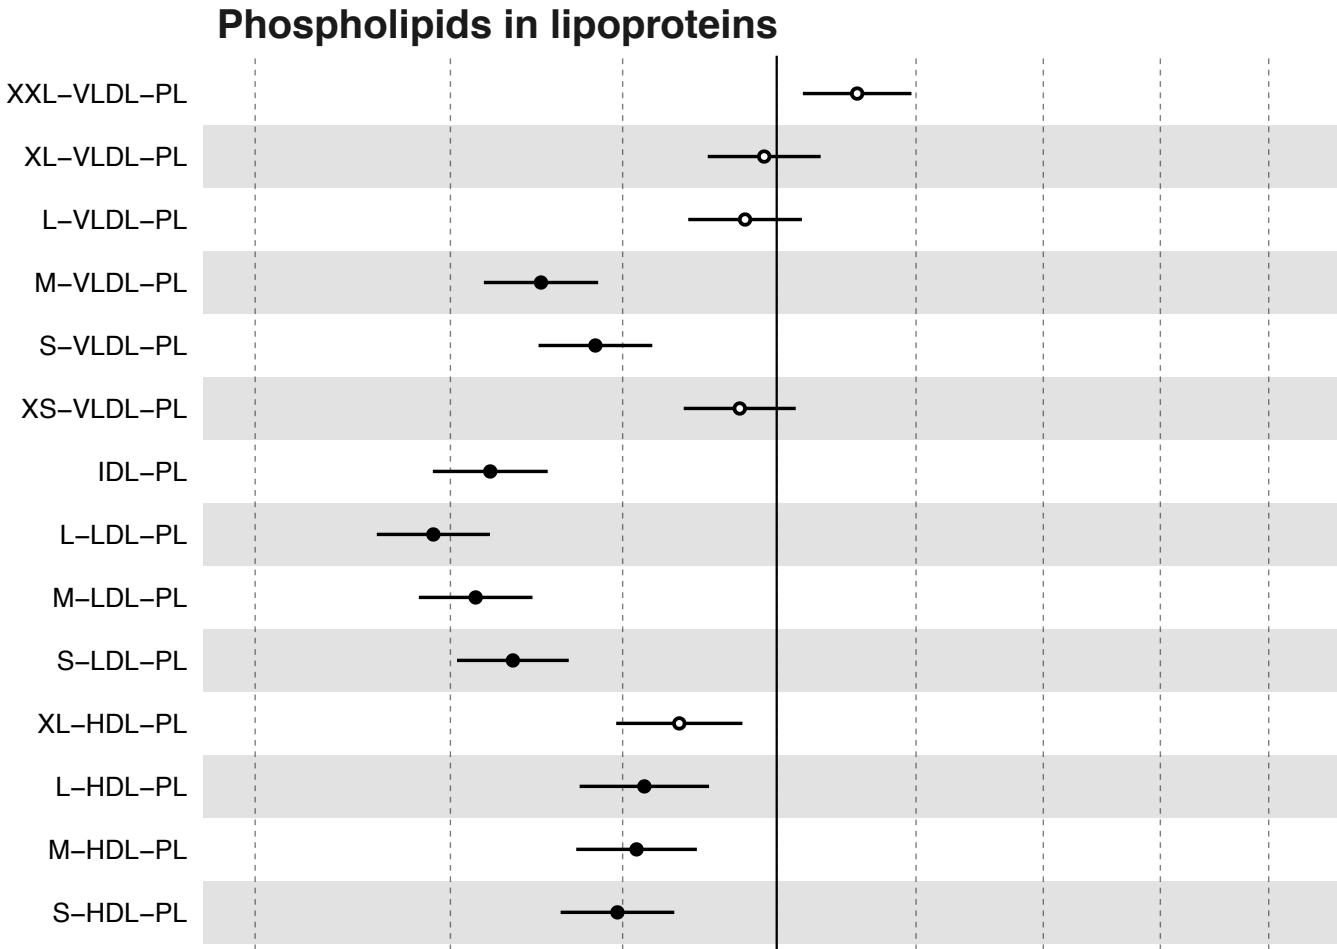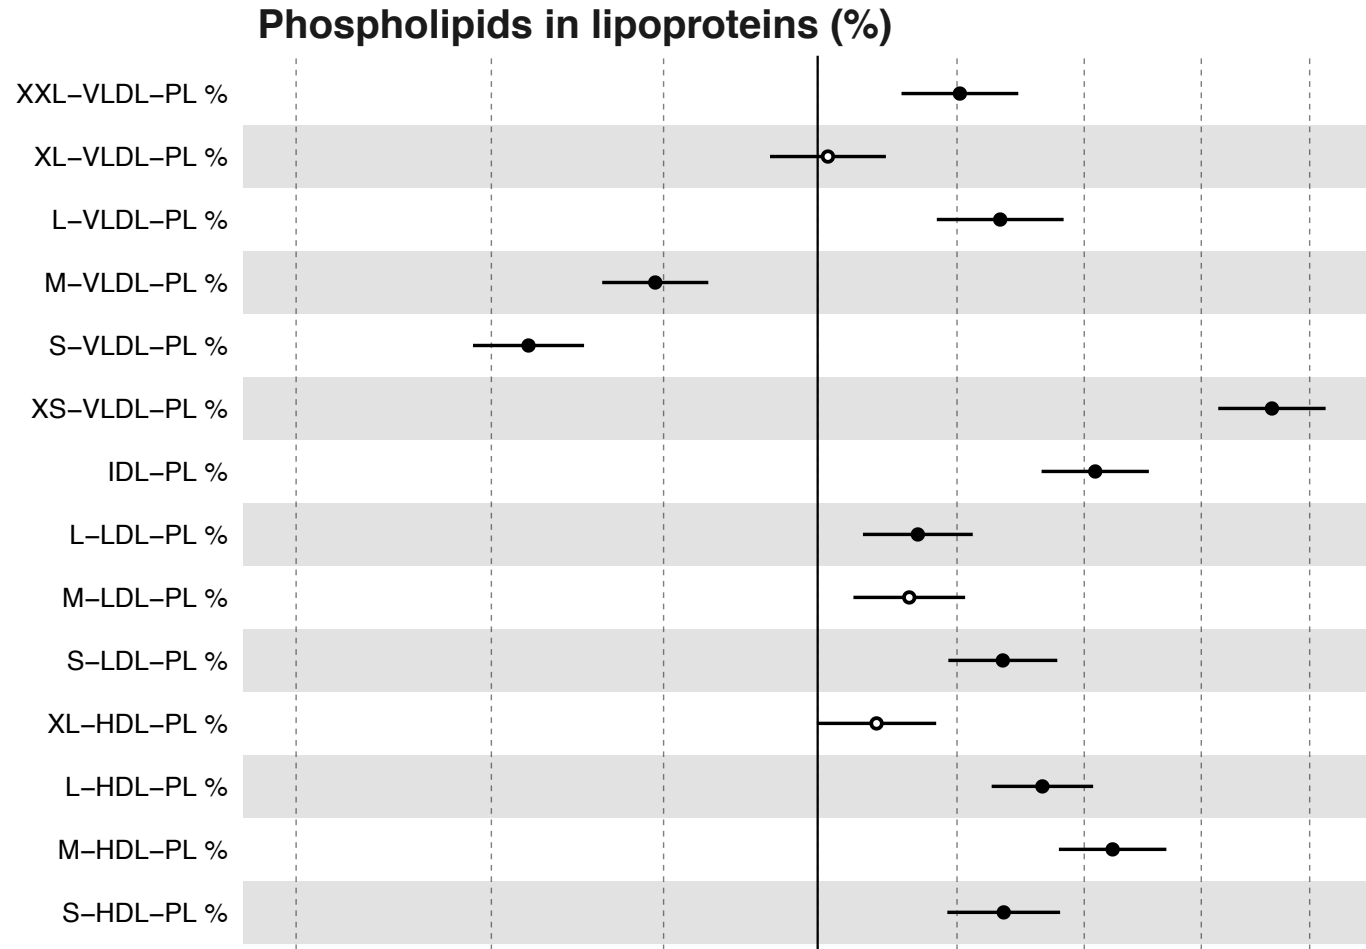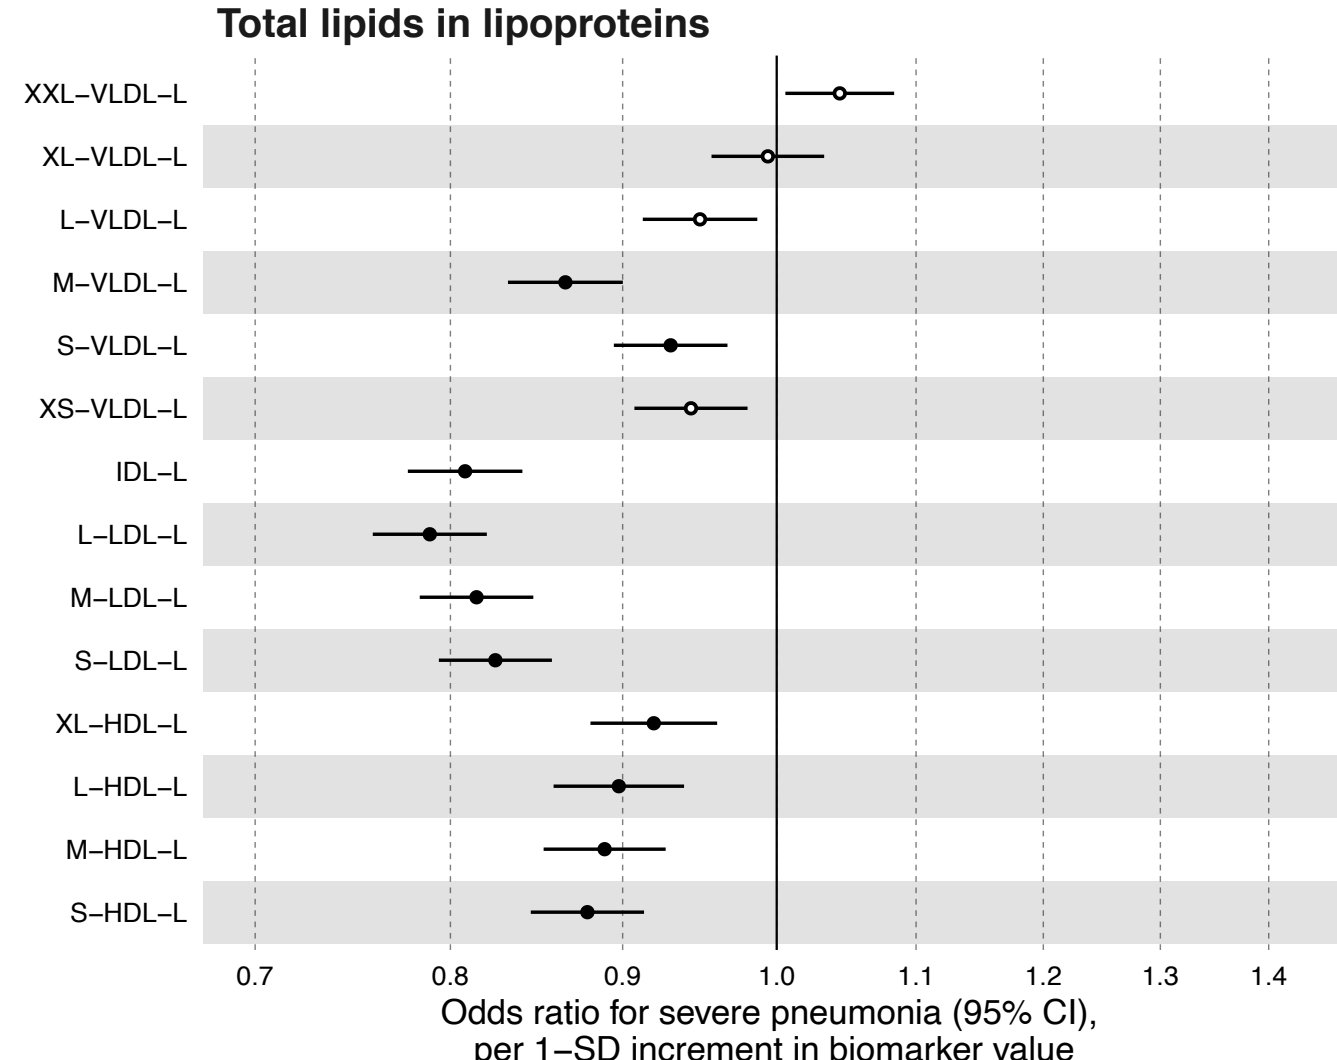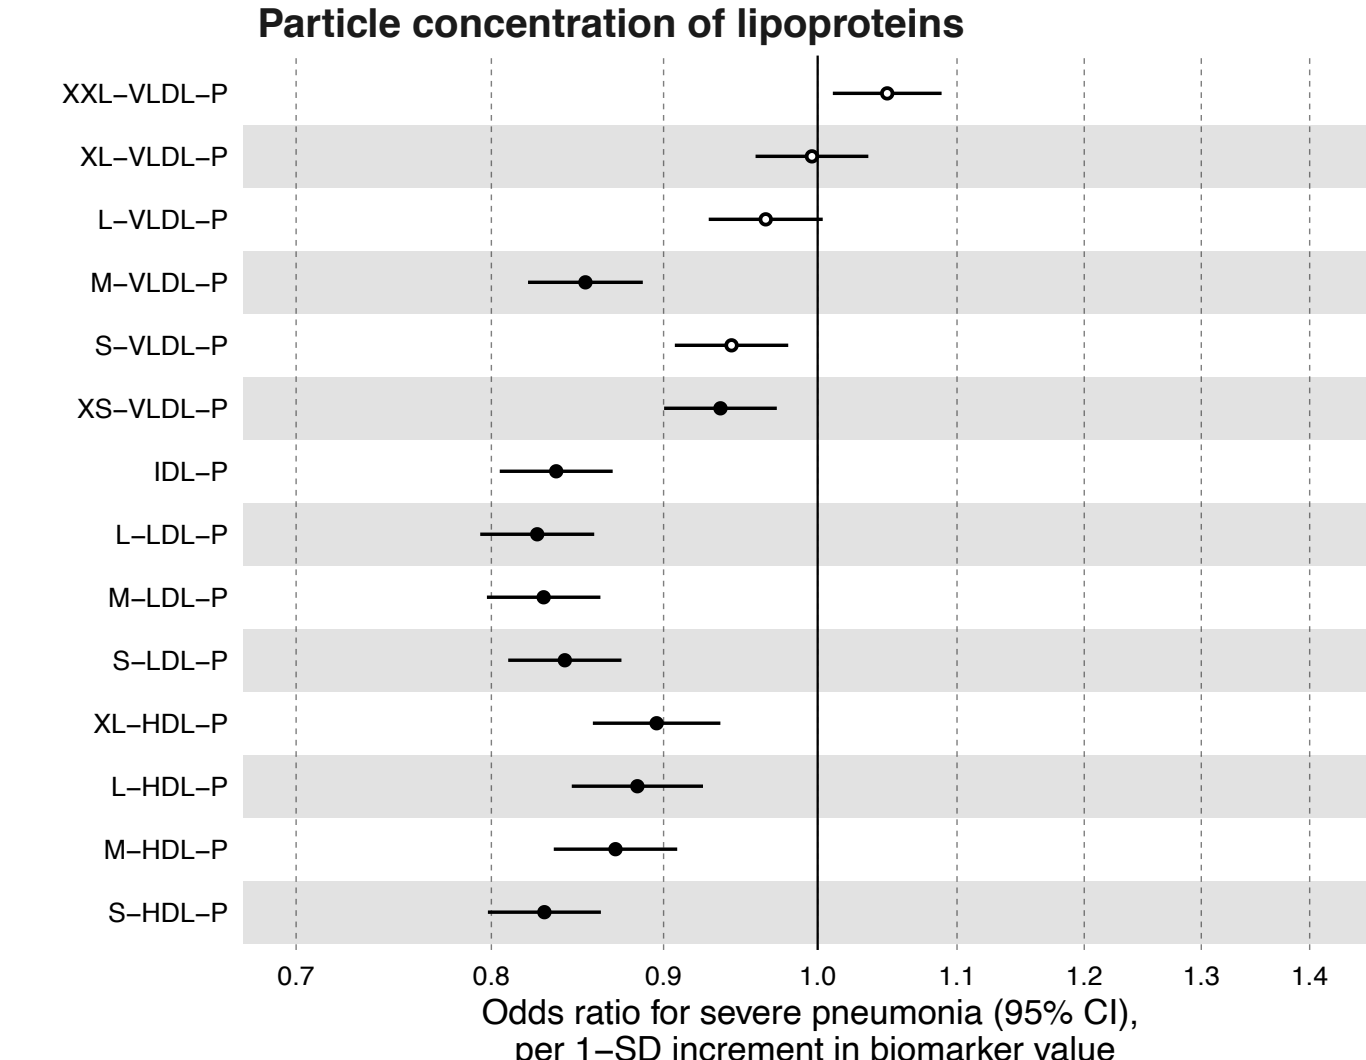

Supplement: supp [file elife-63033-supp-v1.zip]
